# Supplementary material for: New World Bats Harbor Diverse Influenza A Viruses
Source: PubMed Central journal article supplement (PMC3794996; doi:10.1371/journal.ppat.1003657), 2013-10-10

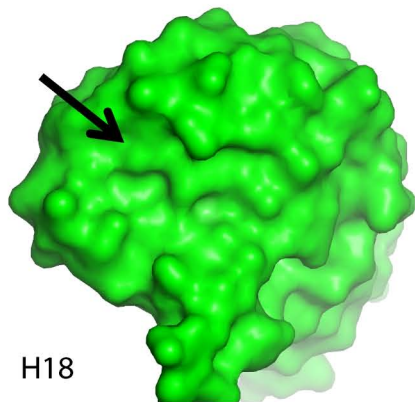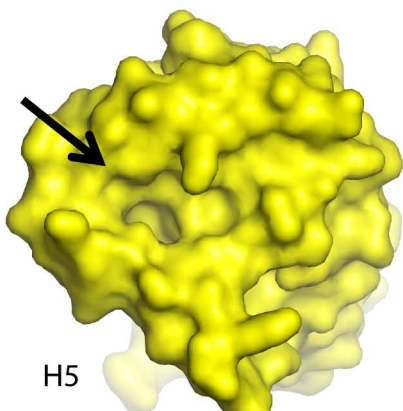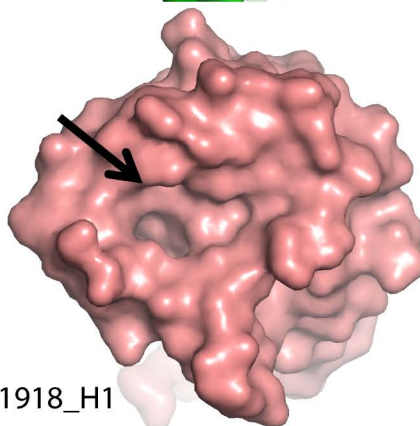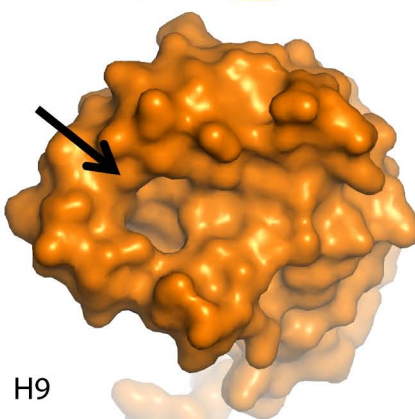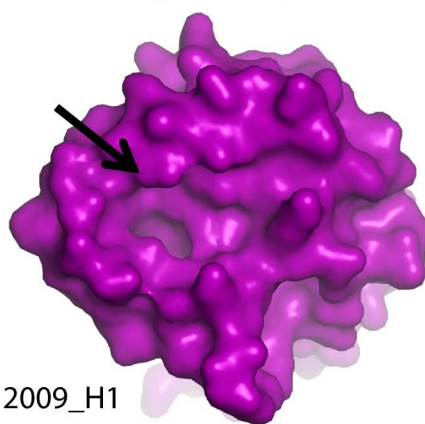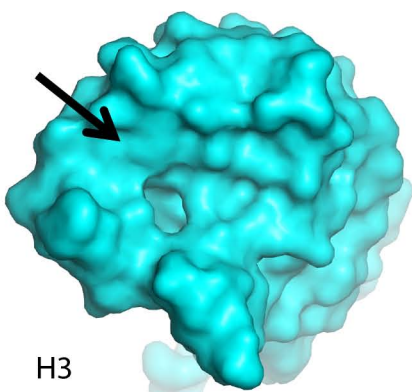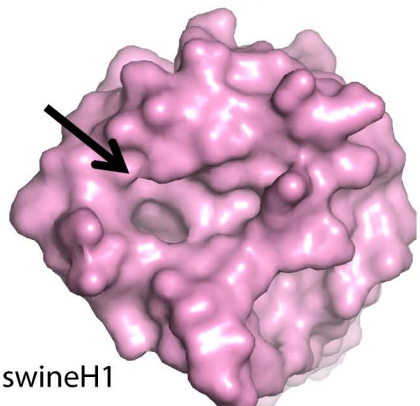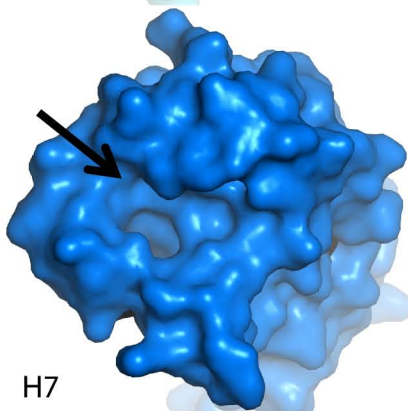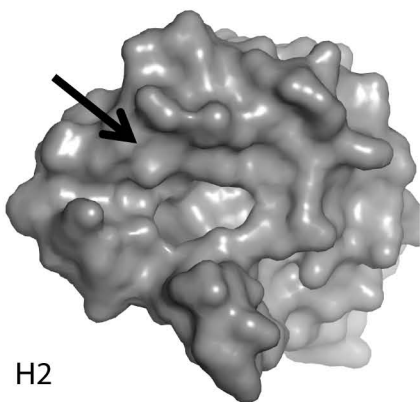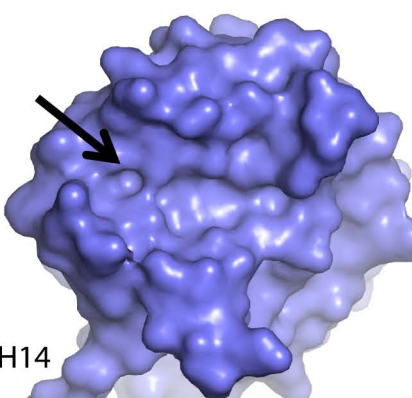

Supplement: ppat.1003657.s004.pdf [file ppat.1003657.s004.pdf]
