# Supplementary material for: New World Bats Harbor Diverse Influenza A Viruses
Source: PLoS Pathog. 2013 Oct 10;9(10):e1003657. doi: 10.1371/journal.ppat.1003657 (PMC3794996; doi:10.1371/journal.ppat.1003657)
Supplement: Table S9 — List of glycans on the microarray. (XLS) [file ppat.1003657.s017.xls]

## Sheet: v5.0 (611)
	Table S9. List of glycans on the microarray
Chart Number	Structure on Masterlist	Cartoon
1	Galα-Sp8
2	Glcα-Sp8
3	Manα-Sp8
4	GalNAcα-Sp8
5	GalNAcα-Sp15
6	Fucα-Sp8
7	Fucα-Sp9
8	Rhaα-Sp8
9	Neu5Acα-Sp8
10	Neu5Acα-Sp11
11	Neu5Acβ-Sp8
12	Galβ-Sp8
13	Glcβ-Sp8
14	Manβ-Sp8
15	GalNAcβ-Sp8
16	GlcNAcβ-Sp0
17	GlcNAcβ-Sp8
18	GlcN(Gc)β-Sp8
19	Galβ1-4GlcNAcβ1-6(Galβ1-4GlcNAcβ1-3)GalNAcα-Sp8
20	Galβ1-4GlcNAcβ1-6(Galβ1-4GlcNAcβ1-3)GalNAc-Sp14
21	GlcNAcβ1-6(GlcNAcβ1-4)(GlcNAcβ1-3)GlcNAc-Sp8
22	6S(3S)Galβ1-4(6S)GlcNAcβ-Sp0
23	6S(3S)Galβ1-4GlcNAcβ-Sp0
24	(3S)Galβ1-4(Fucα1-3)(6S)Glc-Sp0
25	(3S)Galβ1-4Glcβ-Sp8
26	(3S)Galβ1-4(6S)Glcβ-Sp0
27	(3S)Galβ1-4(6S)Glcβ-Sp8
28	(3S)Galβ1-3(Fucα1-4)GlcNAcβ-Sp8
29	(3S)Galβ1-3GalNAcα-Sp8
30	(3S)Galβ1-3GlcNAcβ-Sp0
31	(3S)Galβ1-3GlcNAcβ-Sp8
32	(3S)Galβ1-4(Fucα1-3)GlcNAc-Sp0
33	(3S)Galβ1-4(Fucα1-3)GlcNAc-Sp8
34	(3S)Galβ1-4(6S)GlcNAcβ-Sp0
35	(3S)Galβ1-4(6S)GlcNAcβ-Sp8
36	(3S)Galβ1-4GlcNAcβ-Sp0
37	(3S)Galβ1-4GlcNAcβ-Sp8
38	(3S)Galβ-Sp8
39	(6S)(4S)Galβ1-4GlcNAcβ-Sp0
40	(4S)Galβ1-4GlcNAcβ-Sp8
41	(6P)Manα-Sp8
42	(6S)Galβ1-4Glcβ-Sp0
43	(6S)Galβ1-4Glcβ-Sp8
44	(6S)Galβ1-4GlcNAcβ-Sp8
45	(6S)Galβ1-4(6S)Glcβ-Sp8
46	Neu5Acα2-3(6S)Galβ1-4GlcNAcβ-Sp8
47	(6S)GlcNAcβ-Sp8
48	Neu5,9Ac2α-Sp8
49	Neu5,9Ac2α2-6Galβ1-4GlcNAcβ-Sp8
50	Manα1-6(Manα1-3)Manβ1-4GlcNAcβ1-4GlcNAcβ-Sp12
51	Manα1-6(Manα1-3)Manβ1-4GlcNAcβ1-4GlcNAcβ-Sp13
52	GlcNAcβ1-2Manα1-6(GlcNAcβ1-2Manα1-3)Manβ1-4GlcNAcβ1-4GlcNAcβ-Sp12
53	GlcNAcβ1-2Manα1-6(GlcNAcβ1-2Manα1-3)Manβ1-4GlcNAcβ1-4GlcNAcβ-Sp13
54	Galβ1-4GlcNAcβ1-2Manα1-6(Galβ1-4GlcNAcβ1-2Manα1-3)Manβ1-4GlcNAcβ1-4GlcNAcβ-Sp12
55	Neu5Acα2-6Galβ1-4GlcNAcβ1-2Manα1-6(Neu5Acα2-6Galβ1-4GlcNAcβ1-2Manα1-3)Manβ1-4GlcNAcβ1-4GlcNAcβ-Sp12
56	Neu5Acα2-6Galβ1-4GlcNAcβ1-2Manα1-6(Neu5Acα2-6Galβ1-4GlcNAcβ1-2Man-a1-3)Manβ1-4GlcNAcβ1-4GlcNAcβ-Sp21
57	Neu5Acα2-6Galβ1-4GlcNAcβ1-2Manα1-6(Neu5Acα2-6Galβ1-4GlcNAcβ1-2Manα1-3)Manβ1-4GlcNAcβ1-4GlcNAcβ-Sp24
58	Fucα1-2Galβ1-3GalNAcβ1-3Galα-Sp9
59	Fucα1-2Galβ1-3GalNAcβ1-3Galα1-4Galβ1-4Glcβ-Sp9
60	Fucα1-2Galβ1-3(Fucα1-4)GlcNAcβ-Sp8
61	Fucα1-2Galβ1-3GalNAcα-Sp8
62	Fucα1-2Galβ1-3GalNAcα-Sp14
63	Fucα1-2Galβ1-3GalNAcβ1-4(Neu5Acα2-3)Galβ1-4Glcβ-Sp0
64	Fucα1-2Galβ1-3GalNAcβ1-4(Neu5Acα2-3)Galβ1-4Glcβ-Sp9
65	Fucα1-2Galβ1-3GlcNAcβ1-3Galβ1-4Glcβ-Sp8
66	Fucα1-2Galβ1-3GlcNAcβ1-3Galβ1-4Glcβ-Sp10
67	Fucα1-2Galβ1-3GlcNAcβ-Sp0
68	Fucα1-2Galβ1-3GlcNAcβ-Sp8
69	Fucα1-2Galβ1-4(Fucα1-3)GlcNAcβ1-3Galβ1-4(Fucα1-3)GlcNAcβ-Sp0
70	Fucα1-2Galβ1-4(Fucα1-3)GlcNAcβ1-3Galβ1-4(Fucα1-3)GlcNAcβ1-3Galβ1-4(Fucα1-3)GlcNAcβ-Sp0
71	Fucα1-2Galβ1-4(Fucα1-3)GlcNAcβ-Sp0
72	Fucα1-2Galβ1-4(Fucα1-3)GlcNAcβ-Sp8
73	Fucα1-2Galβ1-4GlcNAcβ1-3Galβ1-4GlcNAcβ-Sp0
74	Fucα1-2Galβ1-4GlcNAcβ1-3Galβ1-4GlcNAcβ1-3Galβ1-4GlcNAcβ-Sp0
75	Fucα1-2Galβ1-4GlcNAcβ-Sp0
76	Fucα1-2Galβ1-4GlcNAcβ-Sp8
77	Fucα1-2Galβ1-4Glcβ-Sp0
78	Fucα1-2Galβ-Sp8
79	Fucα1-3GlcNAcβ-Sp8
80	Fucα1-4GlcNAcβ-Sp8
81	Fucβ1-3GlcNAcβ-Sp8
82	GalNAcα1-3(Fucα1-2)Galβ1-3GlcNAcβ-Sp0
83	GalNAcα1-3(Fucα1-2)Galβ1-4(Fucα1-3)GlcNAcβ-Sp0
84	(3S)Galβ1-4(Fucα1-3)Glcβ-Sp0
85	GalNAcα1-3(Fucα1-2)Galβ1-4GlcNAcβ-Sp0
86	GalNAcα1-3(Fucα1-2)Galβ1-4GlcNAcβ-Sp8
87	GalNAcα1-3(Fucα1-2)Galβ1-4Glcβ-Sp0
88	GlcNAcβ1-3Galβ1-3GalNAcα-Sp8
89	GalNAcα1-3(Fucα1-2)Galβ-Sp8
90	GalNAcα1-3(Fucα1-2)Galβ-Sp18
91	GalNAcα1-3GalNAcβ-Sp8
92	GalNAcα1-3Galβ-Sp8
93	GalNAcα1-4(Fucα1-2)Galβ1-4GlcNAcβ-Sp8
94	GalNAcβ1-3GalNAcα-Sp8
95	GalNAcβ1-3(Fucα1-2)Galβ-Sp8
96	GalNAcβ1-3Galα1-4Galβ1-4GlcNAcβ-Sp0
97	GalNAcβ1-4(Fucα1-3)GlcNAcβ-Sp0
98	GalNAcβ1-4GlcNAcβ-Sp0
99	GalNAcβ1-4GlcNAcβ-Sp8
100	Galα1-2Galβ-Sp8
101	Galα1-3(Fucα1-2)Galβ1-3GlcNAcβ-Sp0
102	Galα1-3(Fucα1-2)Galβ1-3GlcNAcβ-Sp8
103	Galα1-3(Fucα1-2)Galβ1-4(Fucα1-3)GlcNAcβ-Sp0
104	Galα1-3(Fucα1-2)Galβ1-4(Fucα1-3)GlcNAcβ-Sp8
105	Galα1-3(Fucα1-2)Galβ1-4GlcNAc-Sp0
106	Galα1-3(Fucα1-2)Galβ1-4Glcβ-Sp0
107	Galα1-3(Fucα1-2)Galβ-Sp8
108	Galα1-3(Fucα1-2)Galβ-Sp18
109	Galα1-4(Galα1-3)Galβ1-4GlcNAcβ-Sp8
110	Galα1-3GalNAcα-Sp8
111	Galα1-3GalNAcα-Sp16
112	Galα1-3GalNAcβ-Sp8
113	Galα1-3Galβ1-4(Fucα1-3)GlcNAcβ-Sp8
114	Galα1-3Galβ1-3GlcNAcβ-Sp0
115	Galα1-3Galβ1-4GlcNAcβ-Sp8
116	Galα1-3Galβ1-4Glcβ-Sp0
117	Galα1-3Galβ1-4Glc-Sp10
118	Galα1-3Galβ-Sp8
119	Galα1-4(Fucα1-2)Galβ1-4GlcNAcβ-Sp8
120	Galα1-4Galβ1-4GlcNAcβ-Sp0
121	Galα1-4Galβ1-4GlcNAcβ-Sp8
122	Galα1-4Galβ1-4Glcβ-Sp0
123	Galα1-4GlcNAcβ-Sp8
124	Galα1-6Glcβ-Sp8
125	Galβ1-2Galβ-Sp8
126	Galβ1-3(Fucα1-4)GlcNAcβ1-3Galβ1-4(Fucα1-3)GlcNAcβ-Sp0
127	Galβ1-3GlcNAcβ1-3Galβ1-4(Fucα1-3)GlcNAcβ-Sp0
128	Galβ1-3(Fucα1-4)GlcNAc-Sp0
129	Galβ1-3(Fucα1-4)GlcNAc-Sp8
130	Fucα1-4(Galβ1-3)GlcNAcβ-Sp8
131	Galβ1-4GlcNAcβ1-6GalNAcα-Sp8
132	Galβ1-4GlcNAcβ1-6GalNAc-Sp14
133	GlcNAcβ1-6(Galβ1-3)GalNAcα-Sp8
134	GlcNAcβ1-6(Galβ1-3)GalNAcα-Sp14
135	Neu5Acα2-6(Galβ1-3)GalNAcα-Sp8
136	Neu5Acα2-6(Galβ1-3)GalNAcα-Sp14
137	Neu5Acβ2-6(Galβ1-3)GalNAcα-Sp8
138	Neu5Acα2-6(Galβ1-3)GlcNAcβ1-4Galβ1-4Glcβ-Sp10
139	Galβ1-3GalNAcα-Sp8
140	Galβ1-3GalNAcα-Sp14
141	Galβ1-3GalNAcα-Sp16
142	Galβ1-3GalNAcβ-Sp8
143	Galβ1-3GalNAcβ1-3Galα1-4Galβ1-4Glcβ-Sp0
144	Galβ1-3GalNAcβ1-4(Neu5Acα2-3)Galβ1-4Glcβ-Sp0
145	Galβ1-3GalNAcβ1-4Galβ1-4Glcβ-Sp8
146	Galβ1-3Galβ-Sp8
147	Galβ1-3GlcNAcβ1-3Galβ1-4GlcNAcβ-Sp0
148	Galβ1-3GlcNAcβ1-3Galβ1-4Glcβ-Sp10
149	Galβ1-3GlcNAcβ-Sp0
150	Galβ1-3GlcNAcβ-Sp8
151	Galβ1-4(Fucα1-3)GlcNAcβ-Sp0
152	Galβ1-4(Fucα1-3)GlcNAcβ-Sp8
153	Galβ1-4(Fucα1-3)GlcNAcβ1-3Galβ1-4(Fucα1-3)GlcNAcβ-Sp0
154	Galβ1-4(Fucα1-3)GlcNAcβ1-3Galβ1-4(Fucα1-3)GlcNAcβ1-3Galβ1-4(Fucα1-3)GlcNAcβ-Sp0
155	Galβ1-4(6S)Glcβ-Sp0
156	Galβ1-4(6S)Glcβ-Sp8
157	Galβ1-4GalNAcα1-3(Fucα1-2)Galβ1-4GlcNAcβ-Sp8
158	Galβ1-4GalNAcβ1-3(Fucα1-2)Galβ1-4GlcNAcβ-Sp8
159	Galβ1-4GlcNAcβ1-3GalNAcα-Sp8
160	Galβ1-4GlcNAcβ1-3GalNAc-Sp14
161	Galβ1-4GlcNAcβ1-3Galβ1-4(Fucα1-3)GlcNAcβ1-3Galβ1-4(Fucα1-3)GlcNAcβ-Sp0
162	Galβ1-4GlcNAcβ1-3Galβ1-4GlcNAcβ1-3Galβ1-4GlcNAcβ-Sp0
163	Galβ1-4GlcNAcβ1-3Galβ1-4GlcNAcβ-Sp0
164	Galβ1-4GlcNAcβ1-3Galβ1-4Glcβ-Sp0
165	Galβ1-4GlcNAcβ1-3Galβ1-4Glcβ-Sp8
166	Galβ1-4GlcNAcβ1-6(Galβ1-3)GalNAcα-Sp8
167	Galβ1-4GlcNAcβ1-6(Galβ1-3)GalNAc-Sp14
168	Galβ1-4GlcNAcβ-Sp0
169	Galβ1-4GlcNAcβ-Sp8
170	Galβ1-4GlcNAcβ-Sp23
171	Galβ1-4Glcβ-Sp0
172	Galβ1-4Glcβ-Sp8
173	GlcNAcα1-3Galβ1-4GlcNAcβ-Sp8
174	GlcNAcα1-6Galβ1-4GlcNAcβ-Sp8
175	GlcNAcβ1-2Galβ1-3GalNAcα-Sp8
176	GlcNAcβ1-6(GlcNAcβ1-3)GalNAcα-Sp8
177	GlcNAcβ1-6(GlcNAcβ1-3)GalNAcα-Sp14
178	GlcNAcβ1-6(GlcNAcβ1-3)Galβ1-4GlcNAcβ-Sp8
179	GlcNAcβ1-3GalNAcα-Sp8
180	GlcNAcβ1-3GalNAcα-Sp14
181	GlcNAcβ1-3Galβ-Sp8
182	GlcNAcβ1-3Galβ1-4GlcNAcβ-Sp0
183	GlcNAcβ1-3Galβ1-4GlcNAcβ-Sp8
184	GlcNAcβ1-3Galβ1-4GlcNAcβ1-3Galβ1-4GlcNAcβ-Sp0
185	GlcNAcβ1-3Galβ1-4Glcβ-Sp0
186	GlcNAcβ1-4-MDPLys
187	GlcNAcβ1-6(GlcNAcβ1-4)GalNAcα-Sp8
188	GlcNAcβ1-4Galβ1-4GlcNAcβ-Sp8
189	GlcNAcβ1-4GlcNAcβ1-4GlcNAcβ1-4GlcNAcβ1-4GlcNAcβ1-4GlcNAcβ1-Sp8
190	GlcNAcβ1-4GlcNAcβ1-4GlcNAcβ1-4GlcNAcβ1-4GlcNAcβ1-Sp8
191	GlcNAcβ1-4GlcNAcβ1-4GlcNAcβ-Sp8
192	GlcNAcβ1-6GalNAcα-Sp8
193	GlcNAcβ1-6GalNAcα-Sp14
194	GlcNAcβ1-6Galβ1-4GlcNAcβ-Sp8
195	Glcα1-4Glcβ-Sp8
196	Glcα1-4Glcα-Sp8
197	Glcα1-6Glcα1-6Glcβ-Sp8
198	Glcβ1-4Glcβ-Sp8
199	Glcβ1-6Glcβ-Sp8
200	G-ol-Sp8
201	GlcAα-Sp8
202	GlcAβ-Sp8
203	GlcAβ1-3Galβ-Sp8
204	GlcAβ1-6Galβ-Sp8
205	KDNα2-3Galβ1-3GlcNAcβ-Sp0
206	KDNα2-3Galβ1-4GlcNAcβ-Sp0
207	Manα1-2Manα1-2Manα1-3Manα-Sp9
208	Manα1-2Manα1-6(Manα1-2Manα1-3)Manα-Sp9
209	Manα1-2Manα1-3Manα-Sp9
210	Manα1-6(Manα1-2Manα1-3)Manα1-6(Manα1-2Manα1-3)Manβ1-4GlcNAcβ1-4GlcNAcβ-Sp12
211	Manα1-2Manα1-6(Manα1-3)Manα1-6(Manα1-2Manα1-2Manα1-3)Manβ1-4GlcNAcβ1-4GlcNAcβ-Sp12
212	Manα1-2Manα1-6(Manα1-2Manα1-3)Manα1-6(Manα1-2Manα1-2Manα1-3)Manβ1-4GlcNAcβ1-4GlcNAcβ-Sp12
213	Manα1-6(Manα1-3)Manα-Sp9
214	Manα1-2Manα1-2Manα1-6(Manα1-3)Manα-Sp9
215	Manα1-6(Manα1-3)Manα1-6(Manα1-2Manα1-3)Manβ1-4GlcNAcβ1-4GlcNAcβ-Sp12
216	Manα1-6(Manα1-3)Manα1-6(Manα1-3)Manβ1-4GlcNAcβ1-4 GlcNAcβ-Sp12
217	Manβ1-4GlcNAcβ-Sp0
218	Neu5Acα2-3Galβ1-4GlcNAcβ1-3Galβ1-4(Fucα1-3)GlcNAcβ-Sp0
219	(3S)Galβ1-4(Fucα1-3)(6S)GlcNAcβ-Sp8
220	Fucα1-2(6S)Galβ1-4GlcNAcβ-Sp0
221	Fucα1-2Galβ1-4(6S)GlcNAcβ-Sp8
222	Fucα1-2(6S)Galβ1-4(6S)Glcβ-Sp0
223	Neu5Acα2-3Galβ1-3GalNAcα-Sp8
224	Neu5Acα2-3Galβ1-3GalNAcα-Sp14
225	GalNAcβ1-4(Neu5Acα2-8Neu5Acα2-8Neu5Acα2-8Neu5Acα2-3)Galβ1-4Glcβ-Sp0
226	GalNAcβ1-4(Neu5Acα2-8Neu5Acα2-8Neu5Acα2-3)Galβ1-4Glcβ-Sp0
227	Neu5Acα2-8Neu5Acα2-8Neu5Acα2-3Galβ1-4Glcβ-Sp0
228	GalNAcβ1-4(Neu5Acα2-8Neu5Acα2-3)Galβ1-4Glcβ-Sp0
229	Neu5Acα2-8Neu5Acα2-8Neu5Acα-Sp8
230	Neu5Acα2-3(6S)Galβ1-4(Fucα1-3)GlcNAcβ-Sp8
231	GalNAcβ1-4(Neu5Acα2-3)Galβ1-4GlcNAcβ-Sp0
232	GalNAcβ1-4(Neu5Acα2-3)Galβ1-4GlcNAcβ-Sp8
233	GalNAcβ1-4(Neu5Acα2-3)Galβ1-4Glcβ-Sp0
234	Neu5Acα2-3Galβ1-3GalNAcβ1-4(Neu5Acα2-3)Galβ1-4Glcβ-Sp0
235	Neu5Acα2-6(Neu5Acα2-3)GalNAcα-Sp8
236	Neu5Acα2-3GalNAcα-Sp8
237	Neu5Acα2-3GalNAcβ1-4GlcNAcβ-Sp0
238	Neu5Acα2-3Galβ1-3(6S)GlcNAc-Sp8
239	Neu5Acα2-3Galβ1-3(Fucα1-4)GlcNAcβ-Sp8
240	Neu5Acα2-3Galβ1-3(Fucα1-4)GlcNAcβ1-3Galβ1-4(Fucα1-3)GlcNAcβ-Sp0
241	Neu5Acα2-3Galβ1-4(Neu5Acα2-3Galβ1-3)GlcNAcβ-Sp8
242	Neu5Acα2-3Galβ1-3(6S)GalNAcα-Sp8
243	Neu5Acα2-6(Neu5Acα2-3Galβ1-3)GalNAcα-Sp8
244	Neu5Acα2-6(Neu5Acα2-3Galβ1-3)GalNAcα-Sp14
245	Neu5Acα2-3Galβ-Sp8
246	Neu5Acα2-3Galβ1-3GalNAcβ1-3Galα1-4Galβ1-4Glcβ-Sp0
247	Neu5Acα2-3Galβ1-3GlcNAcβ1-3Galβ1-4GlcNAcβ-Sp0
248	Fucα1-2(6S)Galβ1-4Glcβ-Sp0
249	Neu5Acα2-3Galβ1-3GlcNAcβ-Sp0
250	Neu5Acα2-3Galβ1-3GlcNAcβ-Sp8
251	Neu5Acα2-3Galβ1-4(6S)GlcNAcβ-Sp8
252	Neu5Acα2-3Galβ1-4(Fucα1-3)(6S)GlcNAcβ-Sp8
253	Neu5Acα2-3Galβ1-4(Fucα1-3)GlcNAcβ1-3Galβ1-4(Fucα1-3)GlcNAcβ1-3Galβ1-4(Fucα1-3)GlcNAcβ-Sp0
254	Neu5Acα2-3Galβ1-4(Fucα1-3)GlcNAcβ-Sp0
255	Neu5Acα2-3Galβ1-4(Fucα1-3)GlcNAcβ-Sp8
256	Neu5Acα2-3Galβ1-4(Fucα1-3)GlcNAcβ1-3Galβ-Sp8
257	Neu5Acα2-3Galβ1-4(Fucα1-3)GlcNAcβ1-3Galβ1-4GlcNAcβ-Sp8
258	Neu5Acα2-3Galβ1-4GlcNAcβ1-3Galβ1-4GlcNAcβ1-3Galβ1-4GlcNAcβ-Sp0
259	Neu5Acα2-3Galβ1-4GlcNAcβ-Sp0
260	Neu5Acα2-3Galβ1-4GlcNAcβ-Sp8
261	Neu5Acα2-3Galβ1-4GlcNAcβ1-3Galβ1-4GlcNAcβ-Sp0
262	Fucα1-2Galβ1-4(6S)Glcβ-Sp0
263	Neu5Acα2-3Galβ1-4Glcβ-Sp0
264	Neu5Acα2-3Galβ1-4Glcβ-Sp8
265	Neu5Acα2-6GalNAcα-Sp8
266	Neu5Acα2-6GalNAcβ1-4GlcNAcβ-Sp0
267	Neu5Acα2-6Galβ1-4(6S)GlcNAcβ-Sp8
268	Neu5Acα2-6Galβ1-4GlcNAcβ-Sp0
269	Neu5Acα2-6Galβ1-4GlcNAcβ-Sp8
270	Neu5Acα2-6Galβ1-4GlcNAcβ1-3Galβ1-4(Fucα1-3)GlcNAcβ1-3Galβ1-4(Fucα1-3)GlcNAcβ-Sp0
271	Neu5Acα2-6Galβ1-4GlcNAcβ1-3Galβ1-4GlcNAcβ-Sp0
272	Neu5Acα2-6Galβ1-4Glcβ-Sp0
273	Neu5Acα2-6Galβ1-4Glcβ-Sp8
274	Neu5Acα2-6Galβ-Sp8
275	Neu5Acα2-8Neu5Acα-Sp8
276	Neu5Acα2-8Neu5Acα2-3Galβ1-4Glcβ-Sp0
277	Galβ1-3(Fucα1-4)GlcNAcβ1-3Galβ1-3(Fucα1-4)GlcNAcβ-Sp0
278	Neu5Acβ2-6GalNAcα-Sp8
279	Neu5Acβ2-6Galβ1-4GlcNAcβ-Sp8
280	Neu5Gcα2-3Galβ1-3(Fucα1-4)GlcNAcβ-Sp0
281	Neu5Gcα2-3Galβ1-3GlcNAcβ-Sp0
282	Neu5Gcα2-3Galβ1-4(Fucα1-3)GlcNAcβ-Sp0
283	Neu5Gcα2-3Galβ1-4GlcNAcβ-Sp0
284	Neu5Gcα2-3Galβ1-4Glcβ-Sp0
285	Neu5Gcα2-6GalNAcα-Sp0
286	Neu5Gcα2-6Galβ1-4GlcNAcβ-Sp0
287	Neu5Gcα-Sp8
288	Neu5Acα2-3Galβ1-4GlcNAcβ1-6(Galβ1-3)GalNAcα-Sp14
289	Galβ1-3GlcNAcβ1-3Galβ1-3GlcNAcβ-Sp0
290	Galβ1-4(Fucα1-3)(6S)GlcNAcβ-Sp0
291	Galβ1-4(Fucα1-3)(6S)Glcβ-Sp0
292	Galβ1-4(Fucα1-3)GlcNAcβ1-3Galβ1-3(Fucα1-4)GlcNAcβ-Sp0
293	Galβ1-4GlcNAcβ1-3Galβ1-3GlcNAcβ-Sp0
294	Neu5Acα2-3Galβ1-3GlcNAcβ1-3Galβ1-3GlcNAcβ-Sp0
295	Neu5Acα2-3Galβ1-4GlcNAcβ1-3Galβ1-3GlcNAcβ-Sp0
296	4S(3S)Galβ1-4GlcNAcβ-Sp0
297	(6S)Galβ1-4(6S)GlcNAcβ-Sp0
298	(6P)Glcβ-Sp10
299	Neu5Acα2-3Galβ1-4(Fucα1-3)GlcNAcβ1-6(Galβ1-3)GalNAcα-Sp14
300	Galβ1-3Galβ1-4GlcNAcβ-Sp8
301	Neu5Acα2-6Galβ1-4GlcNAcβ1-2Manα1-6(Galβ1-4GlcNAcβ1-2Manα1-3)Manβ1-4GlcNAcβ1-4GlcNAcβ-Sp12
302	Galβ1-4GlcNAcβ1-6(Galβ1-4GlcNAcβ1-3)Galβ1-4GlcNAc-Sp0
303	GlcNAcβ1-6(Galβ1-4GlcNAcβ1-3)Galβ1-4GlcNAc-Sp0
304	Galβ1-4GlcNAcα1-6Galβ1-4GlcNAcβ-Sp0
305	Galβ1-4GlcNAcβ1-6Galβ1-4GlcNAcβ-Sp0
306	GalNAcβ1-3Galβ-Sp8
307	GlcAβ1-3GlcNAcβ-Sp8
308	Neu5Acα2-6Galβ1-4GlcNAcβ1-2Manα1-6(GlcNAcβ1-2Manα1-3)Manβ1-4GlcNAcβ1-4GlcNAcβ-Sp12
309	GlcNAcβ1-3Man-Sp10
310	GlcNAcβ1-4GlcNAcβ-Sp10
311	GlcNAcβ1-4GlcNAcβ-Sp12
312	MurNAcβ1-4GlcNAcβ-Sp10
313	Manα1-6Manβ-Sp10
314	Manα1-6(Manα1-3)Manα1-6(Manα1-3)Manβ-Sp10
315	Manα1-2Manα1-6(Manα1-3)Manα1-6(Manα1-2Manα1-2Manα1-3)Manα-Sp9
316	Manα1-2Manα1-6(Manα1-2Manα1-3)Manα1-6(Manα1-2Manα1-2Manα1-3)Manα-Sp9
317	Neu5Acα2-3Galβ1-4GlcNAcβ1-6(Neu5Acα2-3Galβ1-3)GalNAcα-Sp14
318	Neu5Acα2-6Galβ1-4GlcNAcβ1-2Manα1-6(Neu5Acα2-3Galβ1-4GlcNAcβ1-2Manα1-3)Manβ1-4GlcNAcβ1-4GlcNAcβ-Sp12
319	Galβ1-4GlcNAcβ1-2Manα1-6(Neu5Acα2-6Galβ1-4GlcNAcβ1-2Manα1-3)Manβ1-4GlcNAcβ1-4GlcNAcβ-Sp12
320	GlcNAcβ1-2Manα1-6(Neu5Acα2-6Galβ1-4GlcNAcβ1-2Manα1-3)Manβ1-4GlcNAcβ1-4GlcNAcβ-Sp12
321	Neu5Acα2-8Neu5Acβ-Sp17
322	Neu5Acα2-8Neu5Acα2-8Neu5Acβ-Sp8
323	Neu5Gcβ2-6Galβ1-4GlcNAc-Sp8
324	Galβ1-3GlcNAcβ1-2Manα1-6(Galβ1-3GlcNAcβ1-2Manα1-3)Manβ1-4GlcNAcβ1-4GlcNAcβ-Sp19
325	Neu5Acα2-3Galβ1-4GlcNAcβ1-2Manα1-6(Neu5Acα2-3Galβ1-4GlcNAcβ1-2Manα1-3)Manβ1-4GlcNAcβ1-4GlcNAcβ-Sp12
326	Neu5Acα2-3Galβ1-4GlcNAcβ1-2Manα1-6(Neu5Acα2-6Galβ1-4GlcNAcβ1-2Manα1-3)Manβ1-4GlcNAcβ1-4GlcNAcβ-Sp12
327	Galβ1-4(Fucα1-3)GlcNAcβ1-2Manα1-6(Galβ1-4(Fucα1-3)GlcNAcβ1-2Manα1-3)Manβ1-4GlcNAcβ1-4GlcNAcβ-Sp20
328	Neu5,9Ac2α2-3Galβ1-4GlcNAcβ-Sp0
329	Neu5,9Ac2α2-3Galβ1-3GlcNAcβ-Sp0
330	Neu5Acα2-6Galβ1-4GlcNAcβ1-3Galβ1-3GlcNAcβ-Sp0
331	Neu5Acα2-3Galβ1-3(Fucα1-4)GlcNAcβ1-3Galβ1-3(Fucα1-4)GlcNAcβ-Sp0
332	Neu5Acα2-6Galβ1-4GlcNAcβ1-3Galβ1-4GlcNAcβ1-3Galβ1-4GlcNAcβ-Sp0
333	Galα1-4Galβ1-4GlcNAcβ1-3Galβ1-4Glcβ-Sp0
334	GalNAcβ1-3Galα1-4Galβ1-4GlcNAcβ1-3Galβ1-4Glcβ-Sp0
335	GalNAcα1-3(Fucα1-2)Galβ1-4GlcNAcβ1-3Galβ1-4GlcNAcβ-Sp0
336	GalNAcα1-3(Fucα1-2)Galβ1-4GlcNAcβ1-3Galβ1-4GlcNAcβ1-3Galβ1-4GlcNAcβ-Sp0
337	Neu5Acα2-3-Galβ1-4(Fucα1-3)GlcNAcβ1-6(Neu5Acα2-3Galβ1-3)GalNAc-Sp14
338	GlcNAcα1-4Galβ1-4GlcNAcβ1-3Galβ1-4GlcNAcβ1-3Galβ1-4GlcNAcβ-Sp0
339	GlcNAcα1-4Galβ1-4GlcNAcβ-Sp0
340	GlcNAcα1-4Galβ1-3GlcNAcβ-Sp0
341	GlcNAcα1-4Galβ1-4GlcNAcβ1-3Galβ1-4Glcβ-Sp0
342	GlcNAcα1-4Galβ1-4GlcNAcβ1-3Galβ1-4(Fucα1-3)GlcNAcβ1-3Galβ1-4(Fucα1-3)GlcNAcβ-Sp0
343	GlcNAcα1-4Galβ1-4GlcNAcβ1-3Galβ1-4GlcNAcβ-Sp0
344	GlcNAcα1-4Galβ1-3GalNAc-Sp14
345	Neu5Acα2-6Galβ1-4GlcNAcβ1-2Manα1-6(Manα1-3)Manβ1-4GlcNAcβ1-4GlcNAc-Sp12
346	Manα1-6(Neu5Acα2-6Galβ1-4GlcNAcβ1-2Manα1-3)Manβ1-4GlcNAcβ1-4GlcNAc-Sp12
347	Neu5Acα2-6Galβ1-4GlcNAcβ1-2Manα1-6Manβ1-4GlcNAcβ1-4GlcNAc-Sp12
348	Neu5Acα2-6Galβ1-4GlcNAcβ1-2Manα1-3Manβ1-4GlcNAcβ1-4GlcNAc-Sp12
349	Galβ1-4GlcNAcβ1-2Manα1-3Manβ1-4GlcNAcβ1-4GlcNAc-Sp12
350	Galβ1-4GlcNAcβ1-2Manα1-6Manβ1-4GlcNAcβ1-4GlcNAc-Sp12
351	Manα1-6(Galβ1-4GlcNAcβ1-2Manα1-3)Manβ1-4GlcNAcβ1-4GlcNAcβ-Sp12
352	GlcNAcβ1-2Manα1-6(GlcNAcβ1-2Manα1-3)Manβ1-4GlcNAcβ1-4(Fucα1-6)GlcNAcβ-Sp22
353	Galβ1-4GlcNAcβ1-2Manα1-6(Galβ1-4GlcNAcβ1-2Manα1-3)Manβ1-4GlcNAcβ1-4(Fucα1-6)GlcNAcβ-Sp22
354	Galβ1-3GlcNAcβ1-2Manα1-6(Galβ1-3GlcNAcβ1-2Manα1-3)Manβ1-4GlcNAcβ1-4(Fucα1-6)GlcNAcβ-Sp22
355	(6S)GlcNAcβ1-3Galβ1-4GlcNAcβ-Sp0
356	KDNα2-3Galβ1-4(Fucα1-3)GlcNAc-Sp0
357	KDNα2-6Galβ1-4GlcNAc-Sp0
358	KDNα2-3Galβ1-4Glc-Sp0
359	KDNα2-3Galβ1-3GalNAcα-Sp14
360	Fucα1-2Galβ1-3GlcNAcβ1-2Manα1-6(Fucα1-2Galβ1-3GlcNAcβ1-2Manα1-3)Manβ1-4GlcNAcβ1-4GlcNAcβ-Sp20
361	Fucα1-2Galβ1-4GlcNAcβ1-2Manα1-6(Fucα1-2Galβ1-4GlcNAcβ1-2Manα1-3)Manβ1-4GlcNAcβ1-4GlcNAcβ-Sp20
362	Fucα1-2Galβ1-4(Fucα1-3)GlcNAcβ1-2Manα1-6(Fucα1-2Galβ1-4(Fucα1-3)GlcNAcβ1-2Manα1-3)Manβ1-4GlcNAcβ1-4GlcNAβ-Sp20
363	Galα1-3Galβ1-4GlcNAcβ1-2Manα1-6(Galα1-3Galβ1-4GlcNAcβ1-2Manα1-3)Manβ1-4GlcNAcβ1-4GlcNAcβ-Sp20
364	Galβ1-4GlcNAcβ1-2Manα1-6(Manα1-3)Manβ1-4GlcNAcβ1-4GlcNAcβ-Sp12
365	Fucα1-4(Galβ1-3)GlcNAcβ1-2Manα1-6(Fucα1-4(Galβ1-3)GlcNAcβ1-2Manα1-3)Manβ1-4GlcNAcβ1-4(Fucα1-6)GlcNAcβ-Sp22
366	Neu5Acα2-6GlcNAcβ1-4GlcNAc-Sp21
367	Neu5Acα2-6GlcNAcβ1-4GlcNAcβ1-4GlcNAc-Sp21
368	Galβ1-4(Fucα1-3)GlcNAcβ1-6(Fucα1-2Galβ1-4GlcNAcβ1-3)Galβ1-4Glc-Sp21
369	Galβ1-4GlcNAcβ1-2Manα1-6(Galβ1-4GlcNAcβ1-4(Galβ1-4GlcNAcβ1-2)Manα1-3)Manβ1-4GlcNAcβ1-4GlcNAc-Sp21
370	GalNAcα1-3(Fucα1-2)Galβ1-4GlcNAcβ1-2Manα1-6(GalNAcα1-3(Fucα1-2)Galβ1-4GlcNAcβ1-2Manα1-3)Manβ1-4GlcNAcβ1-4GlcNAcβ-Sp20
371	Galα1-3(Fucα1-2)Galβ1-4GlcNAcβ1-2Manα1-6(Galα1-3(Fucα1-2)Galβ1-4GlcNAcβ1-2Manα1-3)Manβ1-4GlcNAcβ1-4GlcNAcβ-Sp20
372	Galα1-3Galβ1-4(Fucα1-3)GlcNAcβ1-2Manα1-6(Galα1-3Galβ1-4(Fucα1-3)GlcNAcβ1-2Manα1-3)Manβ1-4GlcNAcβ1-4GlcNAcβ-Sp20
373	GalNAcα1-3(Fucα1-2)Galβ1-3GlcNAcβ1-2Manα1-6(GalNAcα1-3(Fucα1-2)Galβ1-3GlcNAcβ1-2Manα1-3)Manβ1-4GlcNAcβ1-4GlcNAcβ-Sp20
374	Galα1-3(Fucα1-2)Galβ1-3GlcNAcβ1-2Manα1-6(Galα1-3(Fucα1-2)Galβ1-3GlcNAcβ1-2Manα1-3)Manβ1-4GlcNAcβ1-4GlcNAcβ-Sp20
375	Fucα1-4(Fucα1-2Galβ1-3)GlcNAcβ1-2Manα1-3(Fucα1-4(Fucα1-2Galβ1-3)GlcNAcβ1-2Manα1-3)Manβ1-4GlcNAcβ1-4GlcNAcβ-Sp19
376	Neu5Acα2-3Galβ1-4GlcNAcβ1-3GalNAc-Sp14
377	Neu5Acα2-6Galβ1-4GlcNAcβ1-3GalNAc-Sp14
378	Neu5Acα2-3Galβ1-4(Fucα1-3)GlcNAcβ1-3GalNAcα-Sp14
379	GalNAcβ1-4GlcNAcβ1-2Manα1-6(GalNAcβ1-4GlcNAcβ1-2Manα1-3)Manβ1-4GlcNAcβ1-4GlcNAc-Sp12
380	Galβ1-3GalNAcα1-3(Fucα1-2)Galβ1-4Glc-Sp0
381	Galβ1-3GalNAcα1-3(Fucα1-2)Galβ1-4GlcNAc-Sp0
382	Galβ1-3GlcNΑcβ1-3Galβ1-4GlcNΑcβ1-6(Galβ1-3GlcNΑcβ1-3)Galβ1-4Glcβ-Sp21
383	Galβ1-4(Fucα1-3)GlcNAcβ1-6(Galβ1-3GlcNAcβ1-3)Galβ1-4Glc-Sp21
384	Galβ1-4GlcNAcβ1-6(Fucα1-4(Fucα1-2Galβ1-3)GlcNAcβ1-3)Galβ1-4Glc-Sp21
385	Galβ1-4(Fucα1-3)GlcNAcβ1-6(Fucα1-4(Fucα1-2Galβ1-3)GlcNAcβ1-3)Galβ1-4Glc-Sp21
386	Galβ1-3GlcNAcβ1-3Galβ1-4(Fucα1-3)GlcNAcβ1-6(Galβ1-3GlcNAcβ1-3)Galβ1-4Glc-Sp21
387	Galβ1-4GlcNΑcβ1-6(Galβ1-4GlcNΑcβ1-2)Manα1-6(Galβ1-4GlcNΑcβ1-4(Galβ1-4GlcNΑcβ1-2)Manα1-3)Manβ1-4GlcNΑcβ1-4GlcNΑcβ-Sp21
388	GlcNΑcβ1-2Manα1-6(GlcNΑcβ1-4(GlcNΑcβ1-2)Manα1-3)Manβ1-4GlcNΑcβ1-4GlcNΑc-Sp21
389	Fucα1-2Galβ1-3GalNAcα1-3(Fucα1-2)Galβ1-4Glcβ-Sp0
390	Fucα1-2Galβ1-3GalNAcα1-3(Fucα1-2)Galβ1-4GlcNAcβ-Sp0
391	Galβ1-3GlcNAcβ1-3GalNAcα-Sp14
392	GalNAcβ1-4(Neu5Acα2-3)Galβ1-4GlcNAcβ1-3GalNAcα-Sp14
393	GalNAcα1-3(Fucα1-2)Galβ1-3GalNAcα1-3(Fucα1-2)Galβ1-4GlcNAcβ-Sp0
394	Galα1-3Galβ1-3GlcNAcβ1-2Manα1-6(Galα1-3Galβ1-3GlcNAcβ1-2Manα1-3)Manβ1-4GlcNAcβ1-4GlcNAc-Sp19
395	Galα1-3Galβ1-3(Fucα1-4)GlcNAcβ1-2Manα1-6(Galα1-3Galβ1-3(Fucα1-4)GlcNAcβ1-2Manα1-3)Manβ1-4GlcNAcβ1-4GlcNAc-Sp19
396	Neu5Acα2-3Galβ1-3GlcNAcβ1-2Manα1-6(Neu5Acα2-3Galβ1-3GlcNAcβ1-2Manα1-3)Manβ1-4GlcNAcβ1-4GlcNAc-Sp19
397	GlcNAcβ1-2Manα1-6(Galβ1-4GlcNAcβ1-2Manα1-3)Manβ1-4GlcNAcβ1-4GlcNAc-Sp12
398	Galβ1-4GlcNAcβ1-2Manα1-6(GlcNAcβ1-2Manα1-3)Manβ1-4GlcNAcβ1-4GlcNAc-Sp12
399	Neu5Acα2-3Galβ1-3GlcNAcβ1-3GalNAcα-Sp14
400	Fucα1-2Galβ1-4GlcNΑcβ1-3GalNΑcα-Sp14
401	Galβ1-4(Fucα1-3)GlcNΑcβ1-3GalNΑcα-Sp14
402	GalNΑcα1-3GalNΑcβ1-3Galα1-4Galβ1-4GlcNΑcβ-Sp0
403	Galα1-4Galβ1-3GlcNΑcβ1-2Manα1-6(Galα1-4Galβ1-3GlcNΑcβ1-2Manα1-3)Manβ1-4GlcNΑcβ1-4GlcNΑcβ-Sp19
404	Galα1-4Galβ1-4GlcNΑcβ1-2Manα1-6(Galα1-4Galβ1-4GlcNΑcβ1-2Manα1-3)Manβ1-4GlcNΑcβ1-4GlcNΑcβ-Sp24
405	Galα1-3Galβ1-4GlcNΑcβ1-3GalNΑcα-Sp14
406	Galβ1-3GlcNAcβ1-6Galβ1-4GlcNAcβ-Sp0
407	Galβ1-3GlcNAcα1-6Galβ1-4GlcNAcβ-Sp0
408	GalNAcβ1-3Galα1-6Galβ1-4Glcβ-Sp8
409	Galα1-3(Fucα1-2)Galβ1-4(Fucα1-3)Glcβ-Sp21
410	Galβ1-4GlcNAcβ1-6(Neu5Acα2-6Galβ1-3GlcNAcβ1-3)Galβ1-4Glc-Sp21
411	Galβ1-3GalNAcβ1-4(Neu5Acα2-8Neu5Acα2-3)Galβ1-4Glcβ-Sp0
412	Neu5Acα2-3Galβ1-3GalNAcβ1-4(Neu5Acα2-8Neu5Acα2-3)Galβ1-4Glcβ-Sp0
413	Galα1-3(Fucα1-2)Galβ1-4GlcNAcβ1-3GalNAcα-Sp14
414	GalNAcα1-3(Fucα1-2)Galβ1-4GlcNAcβ1-3GalNAcα-Sp14
415	GalNAcα1-3GalNAcβ1-3Galα1-4Galβ1-4Glcβ-Sp0
416	Fucα1-2Galβ1-4(Fucα1-3)GlcNAcβ1-3GalNAcα-Sp14
417	Galα1-3(Fucα1-2)Galβ1-4(Fucα1-3)GlcNAcβ1-3GalNAc-Sp14
418	GalNAcα1-3(Fucα1-2)Galβ1-4(Fucα1-3)GlcNAcβ1-3GalNAc-Sp14
419	Galβ1-4(Fucα1-3)GlcNAcβ1-2Manα1-6(Galβ1-4(Fucα1-3)GlcNAcβ1-2Manα1-3)Manβ1-4GlcNAcβ1-4(Fucα1-6)GlcNAcβ-Sp22
420	Fucα1-2Galβ1-4GlcNAcβ1-2Manα1-6(Fucα1-2Galβ1-4GlcNAcβ1-2Manα1-3)Manβ1-4GlcNAcβ1-4(Fucα1-6)GlcNAcβ-Sp22
421	GlcNAcβ1-2(GlcNAcβ1-6)Manα1-6(GlcNAcβ1-2Manα1-3)Manβ1-4GlcNAcβ1-4GlcNAcβ-Sp19
422	Fucα1-2Galβ1-3GlcNAcβ1-3GalNAc-Sp14
423	Galα1-3(Fucα1-2)Galβ1-3GlcNAcβ1-3GalNAc-Sp14
424	GalNAcα1-3(Fucα1-2)Galβ1-3GlcNAcβ1-3GalNAc-Sp14
425	Galα1-3Galβ1-3GlcNAcβ1-3GalNAc-Sp14
426	Fucα1-2Galβ1-3GlcNAcβ1-2Manα1-6(Fucα1-2Galβ1-3GlcNAcβ1-2Manα1-3)Manβ1-4GlcNAcβ1-4(Fucα1-6)GlcNAcβ-Sp22
427	Galα1-3(Fucα1-2)Galβ1-4GlcNAcβ1-2Manα1-6(Galα1-3(Fucα1-2)Galβ1-4GlcNAcβ1-2Manα1-3)Manβ1-4GlcNAcβ1-4(Fucα1-6)GlcNAcβ-Sp22
428	Galβ1-3GlcNAcβ1-6(Galβ1-3GlcNAcβ1-2)Manα1-6(Galβ1-3GlcNAcβ1-2Manα1-3)Manβ1-4GlcNAcβ1-4GlcNAcβ-Sp19
429	Galβ1-4GlcNAcβ1-6(Fucα1-2Galβ1-3GlcNAcβ1-3)Galβ1-4Glc-Sp21
430	Fucα1-3GlcNAcβ1-6(Galβ1-4GlcNAcβ1-3)Galβ1-4Glc-Sp21
431	GlcNAcβ1-2Manα1-6(GlcNAcβ1-4)(GlcNAcβ1-2Manα1-3)Manβ1-4GlcNAcβ1-4GlcNAc-Sp21
432	GlcNAcβ1-2Manα1-6(GlcNAcβ1-4)(GlcNAcβ1-4(GlcNAcβ1-2)Manα1-3)Manβ1-4GlcNAcβ1-4GlcNAc-Sp21
433	GlcNAcβ1-6(GlcNAcβ1-2)Manα1-6(GlcNAcβ1-4)(GlcNAcβ1-2Manα1-3)Manβ1-4GlcNAcβ1-4GlcNAc-Sp21
434	GlcNAcβ1-6(GlcNAcβ1-2)Manα1-6(GlcNAcβ1-4)(GlcNAcβ1-4(GlcNAcβ1-2)Manα1-3)Manβ1-4GlcNAcβ1-4GlcNAc-Sp21
435	Galβ1-4GlcNAcβ1-2Manα1-6(GlcNAcβ1-4)(Galβ1-4GlcNAcβ1-2Manα1-3)Manβ1-4GlcNAcβ1-4GlcNAc-Sp21
436	Galβ1-4GlcNAcβ1-2Manα1-6(GlcNAcβ1-4)(Galβ1-4GlcNAcβ1-4(Galβ1-4GlcNAcβ1-2)Manα1-3)Manβ1-4GlcNAcβ1-4GlcNAc-Sp21
437	Galβ1-4GlcNAcβ1-6(Galβ1-4GlcNAcβ1-2)Manα1-6(GlcNAcβ1-4)(Galβ1-4GlcNAcβ1-2Manα1-3)Manβ1-4GlcNAcβ1-4GlcNAc-Sp21
438	Galβ1-4GlcNAcβ1-6(Galβ1-4GlcNAcβ1-2)Manα1-6(GlcNAcβ1-4)(Galβ1-4GlcNAcβ1-4(Galβ1-4GlcNAcβ1-2)Manα1-3)Manβ1-4GlcNAcβ1-4GlcNAc-Sp21
439	Galβ1-4Galβ-Sp10
440	Galβ1-6Galβ-Sp10
441	Neu5Acα2-3Galβ1-4GlcNAcβ1-3Galβ-Sp8
442	GalNAcβ1-6GalNAcβ-Sp8
443	(6S)Galβ1-3GlcNAcβ-Sp0
444	(6S)Galβ1-3(6S)GlcNAc-Sp0
445	Fucα1-2Galβ1-4 GlcNAcβ1-2Manα1-6(Fucα1-2Galβ1-4GlcNAcβ1-2(Fucα1-2Galβ1-4GlcNAcβ1-4)Manα1-3)Manβ1-4GlcNAcβ1-4GlcNAcβ-Sp12
446	Fucα1-2Galβ1-4(Fucα1-3)GlcNAcβ1-2Manα1-6(Fucα1-2Galβ1-4(Fucα1-3)GlcNAcβ1-4(Fucα1-2Galβ1-4(Fucα1-3)GlcNAcβ1-2)Manα1-3)Manβ1-4GlcNAcβ1-4GlcNAcβ-Sp12
447	Galβ1-4(Fucα1-3)GlcNAcβ1-6GalNAc-Sp14
448	Galβ1-4GlcNAcβ1-2Manα-Sp0
449	Fucα1-2Galβ1-4GlcNAcβ1-6(Fucα1-2Galβ1-4GlcNAcβ1-3)GalNAc-Sp14
450	Galα1-3(Fucα1-2)Galβ1-4GlcNAcβ1-6(Galα1-3(Fucα1-2)Galβ1-4GlcNAcβ1-3)GalNAc-Sp14
451	GalNAcα1-3(Fucα1-2)Galβ1-4GlcNAcβ1-6(GalNAcα1-3(Fucα1-2)Galβ1-4GlcNAcβ1-3)GalNAc-Sp14
452	Neu5Acα2-8Neu5Acα2-3Galβ1-3GalNAcβ1-4(Neu5Acα2-8Neu5Acα2-3)Galβ1-4Glcβ-Sp0
453	GalNAcβ1-4Galβ1-4Glcβ-Sp0
454	GalNAcα1-3(Fucα1-2)Galβ1-4GlcNAcβ1-2Manα1-6(GalNAcα1-3(Fucα1-2)Galβ1-4GlcNAcβ1-2Manα1-3)Manβ1-4GlcNAcβ1-4(Fucα1-6)GlcNAcβ-Sp22
455	Galα1-3(Fucα1-2)Galβ1-3GlcNAcβ1-2Manα1-6(Galα1-3(Fucα1-2)Galβ1-3GlcNAcβ1-2Manα1-3)Manβ1-4GlcNAcβ1-4(Fucα1-6)GlcNAcβ-Sp22
456	Neu5Acα2-6Galβ1-4GlcNAcβ1-6(Fucα1-2Galβ1-3GlcNAcβ1-3)Galβ1-4Glc-Sp21
457	GalNAcα1-3(Fucα1-2)Galβ1-3GlcNAcβ1-2Manα1-6(GalNAcα1-3(Fucα1-2)Galβ1-3GlcNAcβ1-2Manα1-3)Manβ1-4GlcNAcβ1-4(Fucα1-6)GlcNAcβ-Sp22
458	Galβ1-4GlcNAcβ1-6(Galβ1-4GlcNAcβ1-2)Manα1-6(Galβ1-4GlcNAcβ1-2Manα1-3)Manβ1-4GlcNAcβ1-4GlcNAcβ-Sp19
459	Neu5Acα2-3Galβ1-4GlcNAcβ1-2Manα1-6(GlcNAcβ1-4)(Neu5Acα2-3Galβ1-4GlcNAcβ1-2Manα1-3)Manβ1-4GlcNAcβ1-4GlcNAcβ-Sp21
460	Neu5Acα2-3Galβ1-4GlcNAcβ1-4Manα1-6(GlcNAcβ1-4)(Neu5Acα2-3Galβ1-4GlcNAcβ1-4(Neu5Acα2-3Galβ1-4GlcNAcβ1-2)Manα1-3)Manβ1-4GlcNAcβ1-4GlcNAcβ-Sp21
461	Neu5Acα2-3Galβ1-4GlcNAcβ1-6(Neu5Acα2-3Galβ1-4GlcNAcβ1-2)Manα1-6(GlcNAcβ1-4)(Neu5Acα2-3Galβ1-4GlcNAcβ1-2Manα1-3)Manβ1-4GlcNAcβ1-4GlcNAcβ-Sp21
462	Neu5Acα2-3Galβ1-4GlcNAcβ1-6(Neu5Acα2-3Galβ1-4GlcNAcβ1-2)Manα1-6(GlcNAcβ1-4)(Neu5Acα2-3Galβ1-4GlcNAcβ1-4(Neu5Acα2-3Galβ1-4GlcNAcβ1-2)Manα1-3)Manβ1-4GlcNAcβ1-4GlcNAcβ-Sp21
463	Neu5Acα2-6Galβ1-4GlcNAcβ1-2Manα1-6(GlcNAcβ1-4)(Neu5Acα2-6Galβ1-4GlcNAcβ1-2Manα1-3)Manβ1-4GlcNAcβ1-4GlcNAcβ-Sp21
464	Neu5Acα2-6Galβ1-4GlcNAcβ1-4Manα1-6(GlcNAcβ1-4)(Neu5Acα2-6Galβ1-4GlcNAcβ1-4(Neu5Acα2-6Galβ1-4GlcNAcβ1-2)Manα1-3)Manβ1-4GlcNAcβ1-4GlcNAcβ-Sp21
465	Neu5Acα2-6Galβ1-4GlcNAcβ1-6(Neu5Acα2-6Galβ1-4GlcNAcβ1-2)Manα1-6(GlcNAcβ1-4)(Neu5Acα2-6Galβ1-4GlcNAcβ1-2Manα1-3)Manβ1-4GlcNAcβ1-4GlcNAcβ-Sp21
466	Neu5Acα2-6Galβ1-4GlcNAcβ1-6(Neu5Acα2-6Galβ1-4GlcNAcβ1-2)Manα1-6(GlcNAcβ1-4)(Neu5Acα2-6Galβ1-4GlcNAcβ1-4(Neu5Acα2-6Galβ1-4GlcNAcβ1-2)Manα1-3)Manβ1-4GlcNAcβ1-4GlcNAcβ-Sp21
467	Galα1-3(Fucα1-2)Galβ1-3GalNAcα-Sp8
468	Galα1-3(Fucα1-2)Galβ1-3GalNAcβ-Sp8
469	Glcα1-6Glcα1-6Glcα1-6Glcβ-Sp10
470	Glcα1-4Glcα1-4Glcα1-4Glcβ-Sp10
471	Neu5Acα2-3Galβ1-4GlcNAcβ1-6(Neu5Acα2-3Galβ1-4GlcNAcβ1-3)GalNAcα-Sp14
472	Fucα1-2Galβ1-4(Fucα1-3)GlcNAcβ1-2Manα1-6(Fucα1-2Galβ1-4(Fucα1-3)GlcNAcβ1-2Manα1-3)Manβ1-4GlcNAcβ1-4(Fucα1-6)GlcNAcβ-Sp24
473	Fucα1-2Galβ1-3(Fucα1-4)GlcNAcβ1-2Manα1-6(Fucα1-2Galβ1-3(Fucα1-4)GlcNAcβ1-2Manα1-3)Manβ1-4GlcNAcβ1-4(Fucα1-6)GlcNAcβ1-4(Fucα1-6)GlcNAcβ-Sp19
474	Neu5Acα2-3Galβ1-3GlcNAcβ1-6(Neu5Acα2-3Galβ1-3GlcNAcβ1-2)Manα1-6(Neu5Acα2-3Galβ1-3GlcNAcβ1-2Manα1-3)Manβ1-4GlcNAcβ1-4GlcNAcβ-Sp19
475	GlcNAcβ1-6(GlcNAcβ1-2)Manα1-6(GlcNAcβ1-2Manα1-3)Manβ1-4GlcNAcβ1-4(Fucα1-6)GlcNAcβ-Sp24
476	Galβ1-3GlcNAcβ1-2Manα1-6(GlcNAcβ1-4)(Galβ1-3GlcNAcβ1-2Manα1-3)Manβ1-4GlcNAcβ1-4GlcNAcβ-Sp21
477	Neu5Acα2-6Galβ1-4GlcNAcβ1-6(Galβ1-3GlcNAcβ1-3)Galβ1-4Glcβ-Sp21
478	Neu5Acα2-3Galβ1-4GlcNAcβ1-2Manα-Sp0
479	Neu5Acα2-3Galβ1-4GlcNAcβ1-6GalNAcα-Sp14
480	Neu5Acα2-6Galβ1-4GlcNAcβ1-6GalNAcα-Sp14
481	Neu5Acα2-6Galβ1-4 GlcNAcβ1-6(Neu5Acα2-6Galβ1-4GlcNAcβ1-3)GalNAcα-Sp14
482	Neu5Acα2-6Galβ1-4GlcNAcβ1-2Manα1-6(Neu5Acα2-6Galβ1-4GlcNAcβ1-2Manα1-3)Manβ1-4GlcNAcβ1-4(Fucα1-6)GlcNAcβ-Sp24
483	Neu5Acα2-3Galβ1-4GlcNAcβ1-2Manα1-6(Neu5Acα2-3Galβ1-4GlcNAcβ1-2Manα1-3)Manβ1-4GlcNAcβ1-4(Fucα1-6)GlcNAcβ-Sp24
484	Manα1-6(Manα1-3)Manβ1-4GlcNAcβ1-4(Fucα1-6)GlcNAcβ-Sp19
485	Galβ1-4GlcNAcβ1-6(Galβ1-4GlcNAcβ1-2)Manα1-6(Galβ1-4GlcNAcβ1-2Manα1-3)Manβ1-4GlcNAcβ1-4(Fucα1-6)GlcNAcβ-Sp24
486	Neu5Acα2-3Galβ1-3GlcNAcβ1-2Manα1-6(GlcNAcβ1-4)(Neu5Acα2-3Galβ1-3GlcNAcβ1-2Manα1-3)Manβ1-4GlcNAcβ1-4GlcNAc-Sp21
487	Neu5Acα2-6Galβ1-4GlcNAcβ1-6(Fucα1-2Galβ1-4(Fucα1-3)GlcNAcβ1-3)Galβ1-4Glc-Sp21
488	Galβ1-3GlcNAcβ1-6GalNAcα-Sp14
489	Galα1-3Galβ1-3GlcNAcβ1-6GalNAcα-Sp14
490	Galβ1-3(Fucα1-4)GlcNAcβ1-6GalNAcα-Sp14
491	Neu5Acα2-3Galβ1-3GlcNAcβ1-6GalNAcα-Sp14
492	(3S)Galβ1-3(Fucα1-4)GlcNAcβ-Sp0
493	Galβ1-4(Fucα1-3)GlcNAcβ1-6(Neu5Acα2-6(Neu5Acα2-3Galβ1-3)GlcNAcβ1-3)Galβ1-4Glc-Sp21
494	Fucα1-2Galβ1-4GlcNAcβ1-6GalNAcα-Sp14
495	Galα1-3Galβ1-4GlcNAcβ1-6GalNAcα-Sp14
496	Galβ1-4(Fucα1-3)GlcNAcβ1-2Manα-Sp0
497	Fucα1-2(6S)Galβ1-3GlcNAcβ-Sp0
498	Galα1-3(Fucα1-2)Galβ1-4GlcNAcβ1-6GalNAcα-Sp14
499	Fucα1-2Galβ1-4GlcNAcβ1-2Manα-Sp0
500	Fucα1-2Galβ1-3(6S)GlcNAcβ-Sp0
501	Fucα1-2(6S)Galβ1-3(6S)GlcNAcβ-Sp0
502	Neu5Acα2-6GalNAcβ1-4(6S)GlcNAcβ-Sp8
503	GalNAcβ1-4(Fucα1-3)(6S)GlcNAcβ-Sp8
504	(3S)GalNAcβ1-4(Fucα1-3)GlcNAcβ-Sp8
505	Fucα1-2Galβ1-3GlcNAcβ1-6(Fucα1-2Galβ1-3GlcNAcβ1-3)GalNAcα-Sp14
506	GalNAcα1-3(Fucα1-2)Galβ1-3GlcNAcβ1-6GalNAcα-Sp14
507	GlcNAcβ1-6(GlcNAcβ1-2)Manα1-6(GlcNAcβ1-4)(GlcNAcβ1-4(GlcNAcβ1-2)Manα1-3)Manβ1-4GlcNAcβ1-4(Fucα1-6)GlcNAc-Sp21
508	Galβ1-4GlcNAcβ1-6(Galβ1-4GlcNAcβ1-2)Manα1-6(GlcNAcβ1-4)Galβ1-4GlcNAcβ1-4(Gal β1-4GlcNAcβ1-2)Manα1-3)Manβ1-4GlcNAcβ1-4(Fucα1-6)GlcNAc-Sp21
509	Galβ1-3GlcNAcα1-3Galβ1-4GlcNAcβ-Sp8
510	Galβ1-3(6S)GlcNAcβ-Sp8
511	(6S)(4S)GalNAcβ1-4GlcNAc-Sp8
512	(6S)GalNAcβ1-4GlcNAc-Sp8
513	(3S)GalNAcβ1-4(3S)GlcNAc-Sp8
514	GalNAcβ1-4(6S)GlcNAc-Sp8
515	(3S)GalNAcβ1-4GlcNAc-Sp8
516	(4S)GalNAcβ-Sp10
517	Galβ1-4(6P)GlcNAcβ-Sp0
518	(6P)Galβ1-4GlcNAcβ-SP0
519	GalNAcα1-3(Fucα1-2)Galβ1-4GlcNAcβ1-6GalNAc-Sp14
520	Neu5Acα2-6Galβ1-4GlcNAcβ1-2Man-Sp0
521	Galα1-3Galβ1-4GlcNAcβ1-2Manα-Sp0
522	Galα1-3(Fucα1-2)Galβ1-4GlcNAcβ1-2Manα-Sp0
523	GalNAcα1-3(Fucα1-2)Galβ1-4 GlcNAcβ1-2Manα-Sp0
524	Galβ1-3GlcNAcβ1-2Manα-Sp0
525	Galα1-3(Fucα1-2)Galβ1-3GlcNAcβ1-6GalNAc-Sp14
526	Neu5Acα2-3Galβ1-3GlcNAcβ1-2Manα-Sp0
527	Galα1-3Galβ1-3GlcNAcβ1-2Manα-Sp0
528	GalNAcβ1-4GlcNAcβ1-2Manα-Sp0
529	Neu5Acα2-3Galβ1-3GlcNAcβ1-4Galβ1-4Glcβ-Sp0
530	GlcNAcβ1-2 Manα1-6(GlcNAcβ1-4)(GlcNAcβ1-2Manα1-3)Manβ1-4GlcNAcβ1-4(Fucα1-6)GlcNAc-Sp21
531	Galβ1-4GlcNAcβ1-2 Manα1-6(GlcNAcβ1-4)(Galβ1-4GlcNAcβ1-2Manα1-3)Manβ1-4GlcNAcβ1-4(Fucα1-6)GlcNAc-Sp21
532	Galβ1-4GlcNAcβ1-2 Manα1-6(Galβ1-4GlcNAcβ1-4)(Galβ1-4GlcNAcβ1-2Manα1-3)Manβ1-4GlcNAcβ1-4(Fucα1-6)GlcNAc-Sp21
533	Fucα1-4(Galβ1-3)GlcNAcβ1-2 Manα-Sp0
534	Neu5Acα2-3Galβ1-4(Fucα1-3)GlcNAcβ1-2Manα-Sp0
535	GlcNAcβ1-3Galβ1-4GlcNAcβ1-6(GlcNAcβ1-3)Galβ1-4GlcNAc-Sp0
536	GalNAcα1-3(Fucα1-2)Galβ1-3GalNAcβ1-3Galα1-4Galβ1-4Glc-Sp21
537	Galα1-3(Fucα1-2)Galβ1-3GalNAcβ1-3Galα1-4Galβ1-4Glc-Sp21
538	Galβ1-3GalNAcβ1-3Gal-Sp21
539	GlcNAcβ1-3Galβ1-4GlcNAcβ1-2Manα1-6(GlcNAcβ1-3Galβ1-4GlcNAcβ1-2Manα1-3)Manβ1-4GlcNAcβ1-4GlcNAcβ-Sp12
540	GlcNAcβ1-3Galβ1-4GlcNAcβ1-2Manα1-6(GlcNAcβ1-3Galβ1-4GlcNAcβ1-2Manα1-3)Manβ1-4GlcNAcβ1-4GlcNAcβ-Sp25
541	Galβ1-4GlcNAcβ1-3Galβ1-4GlcNAcβ1-2Manα1-6(Galβ1-4GlcNAcβ1-3Galβ1-4GlcNAcβ1-2Manα1-3)Manβ1-4GlcNAcβ1-4GlcNAcβ-Sp12
542	Galβ1-4GlcNAcβ1-3Galβ1-4GlcNAcβ1-2Manα1-6(Galβ1-4GlcNAcβ1-3Galβ1-4GlcNAcβ1-2Manα1-3)Manβ1-4GlcNAcβ1-4GlcNAcβ-Sp24
543	Neu5Gcα2-3Galβ1-4GlcNAcβ1-3Galβ1-4-4GlcNAcβ1-2Manα1-6(Neu5Gcα2-3Galβ1-4GlcNAcβ1-3Galβ1-4GlcNAcβ1-2Manα1-3)Manβ1-4GlcNAcβ1-4GlcNAcβ-Sp24
544	Fucα1-2Galβ1-4GlcNAcβ1-3Galβ1-4GlcNAcβ1-2Manα1-6(Fucα1-2Galβ1-4GlcNAcβ1-3Galβ1-4GlcNAcβ1-2Manα1-3)Manβ1-4GlcNAcβ1-4GlcNAcβ-Sp24
545	GlcNAcβ1-3Galβ1-4GlcNAcβ1-3Galβ1-4GlcNAcβ1-2Manα1-6(GlcNAcβ1-3Galβ1-4GlcNAcβ1-3Galβ1-4GlcNAcβ1-2Manα1-3)Manβ1-4GlcNAcβ1-4GlcNAcβ-Sp12
546	GlcNAcβ1-3Galβ1-4GlcNAcβ1-3Galβ1-4GlcNAcβ1-2Manα1-6(GlcNAcβ1-3Galβ1-4GlcNAcβ1-3Galβ1-4GlcNAcβ1-2Manα1-3)Manβ1-4GlcNAcβ1-4GlcNAcβ-Sp25
547	Galβ1-4GlcNAcβ1-3Galβ1-4GlcNAcβ1-3Galβ1-4GlcNAcβ1-2Manα1-6(Galβ1-4GlcNAcβ1-3Galβ1-4GlcNAcβ1-3Galβ1-4GlcNAcβ1-2Manα1-3)Manβ1-4GlcNAcβ1-4GlcNAcβ-Sp12
548	Galβ1-4GlcNAcβ1-3Galβ1-4GlcNAcβ1-3Galβ1-4GlcNAcβ1-2Manα1-6(Galβ1-4GlcNAcβ1-3Galβ1-4GlcNAcβ1-3Galβ1-4GlcNAcβ1-2Manα1-3)Manβ1-4GlcNAcβ1-4GlcNAcβ-Sp24
549	GlcNAcβ1-3Galβ1-4GlcNAcβ1-3Galβ1-4GlcNAcβ1-3Galβ1-4GlcNAcβ1-2Manα1-6(GlcNAcβ1-3Galβ1-4GlcNAcβ1-3Galβ1-4GlcNAcβ1-3Galβ1-4GlcNAcβ1-2Manα1-3)Manβ1-4GlcNAcβ1-4GlcNAcβ-Sp25
550	Galβ1-4GlcNAcβ1-3Galβ1-4GlcNAcβ1-3Galβ1-4GlcNAcβ1-3Galβ1-4GlcNAcβ1-2Manα1-6(Galβ1-4GlcNAcβ1-3Galβ1-4GlcNAcβ1-3Galβ1-4GlcNAcβ1-3Galβ1-4GlcNAcβ1-2Manα1-3)Manβ1-4GlcNAcβ1-4GlcNAcβ-Sp25
551	Galβ1-3GlcNAcβ1-3Galβ1-4GlcNAcβ1-2Manα1-6(Galβ1-3GlcNAcβ1-3Galβ1-4GlcNAcβ1-2Manα1-3)Manβ1-4GlcNAcβ1-4GlcNAc-Sp25
552	Neu5Gcα2-8Neu5Gcα2-3Galβ1-4GlcNAc-Sp0
553	Neu5Acα2-8Neu5Gcα2-3Galβ1-4GlcNAc-Sp0
554	Neu5Gcα2-8Neu5Acα2-3Galβ1-4GlcNAc-Sp0
555	Neu5Gcα2-8Neu5Gcα2-3Galβ1-4GlcNAcβ1-3Galβ1-4GlcNAc-Sp0
556	Neu5Gcα2-8Neu5Gcα2-6Galβ1-4GlcNAc-Sp0
557	Neu5Acα2-8Neu5Acα2-3Galβ1-4GlcNAc-Sp0
558	GlcNAcβ1-3Galβ1-4GlcNAcβ1-6(GlcNAcβ1-3Galβ1-4GlcNAcβ1-2)Manα1-6(GlcNAcβ1-3Galβ1-4GlcNAcβ1-2Man a1-3)Manβ1-4GlcNAcβ1-4GlcNAc-Sp24
559	Galβ1-4GlcNAcβ1-3Galβ1-4GlcNAcβ1-6(Galβ1-4GlcNAcβ1-3Galβ1-4GlcNAcβ1-2)Manα1-6(Galβ1-4GlcNAcβ1-3Galβ1-4GlcNAcβ1-2Manα1-3)Manβ1-4GlcNAcβ1-4GlcNAc-Sp24
560	Galα1-3Galβ1-4GlcNAcβ1-2Manα1-6(Galα1-3Galβ1-4GlcNAcβ1-2Manα1-3)Manβ1-4GlcNAcβ1-4GlcNAc-Sp24
561	GlcNAcβ1-3Galβ1-4GlcNAcβ1-6(GlcNAcβ1-3Galβ1-3)GalNAcα-Sp14
562	GalNAcβ1-3GlcNAcβ-Sp0
563	GalNAcβ1-4GlcNAcβ1-3GalNAcβ1-4GlcNAcβ-Sp0
564	GlcNAcβ1-3Galβ1-4GlcNAcβ1-3Galβ1-4GlcNAcβ1-3Galβ1-4GlcNAcβ1-3Galβ1-4GlcNAcβ1-2Manα1-6(GlcNAcβ1-3Galβ1-4GlcNAcβ1-3Galβ1-4GlcNAcβ1-3Galβ1-4GlcNAcβ1-3Galβ1-4GlcNAcβ1-2Manα1-3)Manβ1-4GlcNAcβ1-4GlcNAcβ-Sp25
565	Galβ1-4GlcNAcβ1-3Galβ1-4GlcNAcβ1-3Galβ1-4GlcNAcβ1-3Galβ1-4GlcNAcβ1-3Galβ1-4GlcNAcβ1-2Manα1-6(Galβ1-4GlcNAcβ1-3Galβ1-4GlcNAcβ1-3Galβ1-4GlcNAcβ1-3Galβ1-4GlcNAcβ1-3Galβ1-4GlcNAcβ1-2Manα1-3)Manβ1-4GlcNAcβ1-4GlcNAcβ-Sp25
566	GlcNAβ1-3Galβ1-3GalNAc-Sp14
567	Galβ1-3GlcNAcβ1-6(Galβ1-3)GalNAc-Sp14
568	Galβ1-4GlcNAcβ1-3Galβ1-4GlcNAcβ1-3Galβ1-4GlcNAcβ1-3Galβ1-4GlcNAcβ1-3Galβ1-4GlcNAcβ1-3Galβ1-4GlcNAcβ1-2Manα1-6(Galβ1-4GlcNAcβ1-3Galβ1-4GlcNAcβ1-3Galβ1-4GlcNAcβ1-3Galβ1-4GlcNAcβ1-3Galβ1-4GlcNAcβ1-3Galβ1-4GlcNAcβ1-2Manα1-3)Manβ1-4GlcNAcβ1-4GlcNAcβ-Sp25
569	(3S)GlcAβ1-3Galβ1-4GlcNAcβ1-3Galβ1-4Glc-Sp0
570	(3S)GlcAβ1-3Galβ1-4GlcNAcβ1-2Manα-Sp0
571	Galβ1-3GlcNAcβ1-3Galβ1-4GlcNAcβ1-3Galβ1-4GlcNAcβ1-6(Galβ1-3GlcNAcβ1-3Galβ1-4GlcNAcβ1-3Galβ1-4GlcNAβ1-2)Manα1-6(Galβ1-3GlcNAcβ1-3Galβ1-4GlcNAcβ1-3Galβ1-4GlcNAcβ1-2Manα1-3)Manβ1-4GlcNAcβ1-4(Fucα1-6)GlcNAcβ-Sp24
572	Galβ1-3GlcNAcβ1-3Galβ1-4GlcNAcβ1-6(Galβ1-3GlcNAcβ1-3Galβ1-4GlcNAβ1-2)Manα1-6(Galβ1-3GlcNAcβ1-3Galβ1-4GlcNAcβ1-2Manα1-3)Manβ1-4GlcNAcβ1-4(Fucα1-6)GlcNAcβ-Sp24
573	Neu5Acα2-8Neu5Acα2-3Galβ1-3GalNAcβ1-4(Neu5Acα2-3)Galβ1-4Glc-Sp21
574	GlcNAcβ1-3Galβ1-4GlcNAcβ1-2Manα1-6(GlcNAcβ1-3Galβ1-4GlcNAcβ1-2Manα1-3)Manβ1-4GlcNAcβ1-4(Fucα1-6)GlcNAcβ-Sp24
575	Galβ1-4GlcNAcβ1-3Galβ1-4GlcNAcβ1-2Manα1-6(Galβ1-4GlcNAcβ1-3Galβ1-4GlcNAcβ1-2Manα1-3)Manβ1-4GlcNAcβ1-4(Fucα1-6)GlcNAcβ-Sp24
576	GlcNAcβ1-3Galβ1-4GlcNAcβ1-3Galβ1-4GlcNAcβ1-2Manα1-6(GlcNAcβ1-3Galβ1-4GlcNAcβ1-3Galβ1-4GlcNAcβ1-2Manα1-3)Manβ1-4GlcNAcβ1-4(Fucα1-6)GlcNAcβ-Sp24
577	Galβ1-4GlcNAcβ1-3Galβ1-4GlcNAcβ1-3Galβ1-4GlcNAcβ1-2Manα1-6(Galβ1-4GlcNAcβ1-3Galβ1-4GlcNAcβ1-3Galβ1-4GlcNAcβ1-2Manα1-3)Manβ1-4GlcNAcβ1-4(Fucα1-6)GlcNAcβ-Sp24
578	GlcNAcβ1-3Galβ1-4GlcNAcβ1-3Galβ1-4GlcNAcβ1-3Galβ1-4GlcNAcβ1-2Manα1-6(GlcNAcβ1-3Galβ1-4GlcNAcβ1-3Galβ1-4GlcNAcβ1-3Galβ1-4GlcNAcβ1-2Manα1-3)Manβ1-4GlcNAcβ1-4(Fucα1-6)GlcNAcβ-Sp24
579	Galβ1-4GlcNAcβ1-3Galβ1-4GlcNAcβ1-3Galβ1-4GlcNAcβ1-3Galβ1-4GlcNAcβ1-2Manα1-6(Galβ1-4GlcNAcβ1-3Galβ1-4GlcNAcβ1-3Galβ1-4GlcNAcβ1-3Galβ1-4GlcNAcβ1-2Manα1-3)Manβ1-4GlcNAcβ1-4(Fucα1-6)GlcNAcβ-Sp24
580	GlcNAcβ1-3Galβ1-4GlcNAcβ1-3Galβ1-4GlcNAcβ1-3Galβ1-4GlcNAcβ1-3Galβ1-4GlcNAcβ1-2Manα1-6(GlcNAcβ1-3Galβ1-4GlcNAcβ1-3Galβ1-4GlcNAcβ1-3Galβ1-4GlcNAcβ1-3Galβ1-4GlcNAcβ1-2Manα1-3)Manβ1-4GlcNAcβ1-4(Fucα1-6)GlcNAcβ-Sp19
581	Galβ1-4GlcNAcβ1-3Galβ1-4GlcNAcβ1-3Galβ1-4GlcNAcβ1-3Galβ1-4GlcNAcβ1-3Galβ1-4GlcNAcβ1-2Manα1-6(Galβ1-4GlcNAcβ1-3Galβ1-4GlcNAcβ1-3Galβ1-4GlcNAcβ1-3Galβ1-4GlcNAcβ1-3Galβ1-4GlcNAcβ1-2Manα1-3)Manβ1-4GlcNAcβ1-4(Fucα1-6)GlcNAcβ-Sp19
582	Galβ1-4GlcNAcβ1-3Galβ1-4GlcNAcβ1-6(Galβ1-4GlcNAcβ1-3Galβ1-4GlcNAβ1-2)Manα1-6(Galβ1-4GlcNAcβ1-3Galβ1-4GlcNAcβ1-2Manα1-3)Manβ1-4GlcNAcβ1-4(Fucα1-6)GlcNAcβ-Sp24
583	GlcNAcβ1-3Galβ1-4GlcNAcβ1-3Galβ1-4GlcNAcβ1-6(GlcNAcβ1-3Galβ1-4GlcNAcβ1-3Galβ1-4GlcNAβ1-2)Manα1-6(GlcNAcβ1-3Galβ1-4GlcNAcβ1-3Galβ1-4GlcNAcβ1-2Manα1-3)Manβ1-4GlcNAcβ1-4(Fucα1-6)GlcNAcβ-Sp24
584	Galβ1-4GlcNAcβ1-3Galβ1-4GlcNAcβ1-3Galβ1-4GlcNAcβ1-6(Galβ1-4GlcNAcβ1-3Galβ1-4GlcNAcβ1-3Galβ1-4GlcNAβ1-2)Manα1-6(Galβ1-4GlcNAcβ1-3Galβ1-4GlcNAcβ1-3Galβ1-4GlcNAcβ1-2Manα1-3)Manβ1-4GlcNAcβ1-4(Fucα1-6)GlcNAcβ-Sp24
585	GlcNAcβ1-3Galβ1-4GlcNAcβ1-3Galβ1-4GlcNAcβ1-3Galβ1-4GlcNAcβ1-6(GlcNAcβ1-3Galβ1-4GlcNAcβ1-3Galβ1-4GlcNAcβ1-3Galβ1-4GlcNAβ1-2)Manα1-6(GlcNAcβ1-3Galβ1-4GlcNAcβ1-3Galβ1-4GlcNAcβ1-3Galβ1-4GlcNAcβ1-2Manα1-3)Manβ1-4GlcNAcβ1-4(Fucα1-6)GlcNAcβ-Sp24
586	Galβ1-4GlcNAcβ1-3Galβ1-4GlcNAcβ1-3Galβ1-4GlcNAcβ1-3Galβ1-4GlcNAcβ1-6(Galβ1-4GlcNAcβ1-3Galβ1-4GlcNAcβ1-3Galβ1-4GlcNAcβ1-3Galβ1-4GlcNAβ1-2)Manα1-6(Galβ1-4GlcNAcβ1-3Galβ1-4GlcNAcβ1-3Galβ1-4GlcNAcβ1-3Galβ1-4GlcNAcβ1-2Manα1-3)Manβ1-4GlcNAcβ1-4(Fucα1-6)GlcNAcβ-Sp24
587	GlcNAcβ1-3Galβ1-4GlcNAcβ1-3Galβ1-4GlcNAcβ1-3Galβ1-4GlcNAcβ1-3Galβ1-4GlcNAcβ1-6(GlcNAcβ1-3Galβ1-4GlcNAcβ1-3Galβ1-4GlcNAcβ1-3Galβ1-4GlcNAcβ1-3Galβ1-4GlcNAβ1-2)Manα1-6(GlcNAcβ1-3Galβ1-4GlcNAcβ1-3Galβ1-4GlcNAcβ1-3Galβ1-4GlcNAcβ1-3Galβ1-4GlcNAcβ1-2Manα1-3)Manβ1-4GlcNAcβ1-4(Fucα1-6)GlcNAcβ-Sp24
588	Galβ1-4GlcNAcβ1-3Galβ1-4GlcNAcβ1-3Galβ1-4GlcNAcβ1-3Galβ1-4GlcNAcβ1-3Galβ1-4GlcNAcβ1-6(Galβ1-4GlcNAcβ1-3Galβ1-4GlcNAcβ1-3Galβ1-4GlcNAcβ1-3Galβ1-4GlcNAcβ1-3Galβ1-4GlcNAβ1-2)Manα1-6(Galβ1-4GlcNAcβ1-3Galβ1-4GlcNAcβ1-3Galβ1-4GlcNAcβ1-3Galβ1-4GlcNAcβ1-3Galβ1-4GlcNAcβ1-2Manα1-3)Manβ1-4GlcNAcβ1-4(Fucα1-6)GlcNAcβ-Sp24
589	Galβ1-4GlcNAcβ1-3Galβ1-4GlcNAcβ1-3GalNAcα-Sp14
590	Galβ1-4GlcNAcβ1-3Galβ1-4GlcNAcβ1-6(Galβ1-3)GalNAcα-Sp14
591	Galβ1-4GlcNAcβ1-3Galβ1-4GlcNAcβ1-6(Galβ1-4GlcNAcβ1-3Galβ1-4GlcNAcβ1-3)GalNAcα-Sp14
592	Neu5Acα2-3Galβ1-4GlcNAcβ1-3Galβ1-4GlcNAcβ1-3GalNAcα-Sp14
593	GlcNAcβ1-3Galβ1-4GlcNAcβ1-3GalNAcα-Sp14
594	GlcNAcβ1-3Galβ1-4GlcNAcβ1-6(Galβ1-3)GalNAcα-Sp14
595	GlcNAcβ1-3Galβ1-4GlcNAcβ1-6(GlcNAcβ1-3Galβ1-4GlcNAcβ1-3)GalNAcα-Sp14
596	Neu5Acα2-3Galβ1-4GlcNAcβ1-3Galβ1-4GlcNAcβ1-6(Neu5Acα2-3Galβ1-4GlcNAcβ1-3Galβ1-4GlcNAcβ1-3)GalNAcα-Sp14
597	Neu5Acα2-6Galβ1-4GlcNAcβ1-3Galβ1-4GlcNAcβ1-3GalNAcα-Sp14
598	GlcNAcβ1-3Galβ1-4GlcNAcβ1-3Galβ1-4GlcNAcβ1-3GalNAcα-Sp14
599	Galβ1-4GlcNAcβ1-3Galβ1-3GalNAcα-Sp14
600	Neu5Acα2-3Galβ1-4GlcNAcβ1-3Galβ1-4GlcNAcβ1-6(Galβ1-3)GalNAcα-Sp14
601	Neu5Acα2-6Galβ1-4GlcNAcβ1-3Galβ1-4GlcNAcβ1-6(Galβ1-3)GalNAcα-Sp14
602	Neu5Acα2-6Galβ1-4GlcNAcβ1-6(Galβ1-3)GalNAcα-Sp14
603	Neu5Acα2-3Galβ1-4GlcNAcβ1-3Galβ1-4GlcNAcβ1-2Manα1-6(Neu5Acα2-3Galβ1-4GlcNAcβ1-3Galβ1-4GlcNAcβ1-2Manα1-3)Manβ1-4GlcNAcβ1-4GlcNAcβ-Sp12
604	GlcNAcβ1-6(Neu5Acα2-3Galβ1-3)GalNAcα-Sp14
605	Neu5Acα2-6Galβ1-4GlcNAcβ1-3Galβ1-4GlcNAcβ1-6(Neu5Acα2-6Galβ1-4GlcNAcβ1-3Galβ1-4GlcNAcβ1-3)GalNAcα-Sp14
606	Neu5Acα2-6Galβ1-4GlcNAcβ1-3Galβ1-4GlcNAcβ1-3Galβ1-4GlcNAcβ1-2Manα1-6(Neu5Acα2-6Galβ1-4GlcNAcβ1-3Galβ1-4GlcNAcβ1-3Galβ1-4GlcNAcβ1-2Manα1-3)Manβ1-4GlcNAcβ1-4GlcNAcβ-Sp12
607	Neu5Acα2-3Galβ1-4GlcNAcβ1-3Galβ1-4GlcNAcβ1-3Galβ1-4GlcNAcβ1-2Manα1-6(Neu5Acα2-3Galβ1-4GlcNAcβ1-3Galβ1-4GlcNAcβ1-3Galβ1-4GlcNAcβ1-2Manα1-3)Manβ1-4GlcNAcβ1-4GlcNAcβ-Sp12
608	Neu5Acα2-6Galβ1-4GlcNAcβ1-3Galβ1-4GlcNAcβ1-2Manα1-6(Neu5Acα2-6Galβ1-4GlcNAcβ1-3Galβ1-4GlcNAcβ1-2Manα1-3)Manβ1-4GlcNAcβ1-4GlcNAcβ-Sp12
609	GlcNAcβ1-3Fucα-Sp21
610	Galβ1-3GalNAcβ1-4(Neu5Acα2-8Neu5Acα2-8Neu5Acα2-3)Galβ1-4Glcβ-Sp21
	Sp0	CH2CH2NH2
	Sp8	CH2CH2CH2NH2
	Sp9	CH2CH2CH2CH2CH2NH2
	Sp10	NHCOCH2NH
	Sp11	OCH2C6H4-p-NHCOCH2NH
	Sp12	Asparagine
	Sp13	Glycine
	Sp14	Threonine
	Sp15	Serine
	Sp16	PNP (OC6H4NH2)
	Sp17	OCH2C6H4NH2
	Sp18	O(CH2)3NHCO(CH2)5NH2
	Sp19	EN or NK
	Sp20	GENR
	Sp21	N(CH3)-O-(CH2)2-NH2
	Sp22	NST
	Sp23	(OCH2CH2)6NH2
	Sp24	KVANKT
	Sp25	VANK
	MDPLys	Mur-L-Ala-D-iGlnβ-(CH2)4NH2
