# Supplementary material for: New World Bats Harbor Diverse Influenza A Viruses
Source: PLoS Pathog. 2013 Oct 10;9(10):e1003657. doi: 10.1371/journal.ppat.1003657 (PMC3794996; doi:10.1371/journal.ppat.1003657)
Supplement: Table S10 — List of 25 glycans that give strongest binding signals in the microarray. (XLSX) [file ppat.1003657.s018.xlsx]

## Sheet: Sheet1
	Table S10. List of 25 glycans that give strongest binding signals in the microarray
(A)	A/bat/Peru/10 HA
Chart Number	Structure on Masterlist	Average RFU	StDev
79	Fuca1-3GlcNAcb-Sp8	1598.82	534.407
479	Neu5Aca2-3Galb1-4GlcNAcb1-6GalNAca-Sp14	1418	806.734
502	Neu5Aca2-6GalNAcb1-4(6S)GlcNAcb-Sp8	1157.31	818.994
83	GalNAca1-3(Fuca1-2)Galb1-4(Fuca1-3)GlcNAcb-Sp0	1100.44	217.124
429	Galb1-4GlcNAcb1-6(Fuca1-2Galb1-3GlcNAcb1-3)Galb1-4Glc-Sp21	1085.19	766.15
604	GlcNAcb1-6(Neu5Aca2-3Galb1-3)GalNAca-Sp14	1075.03	517.551
560	Gala1-3Galb1-4GlcNAcb1-2Mana1-6(Gala1-3Galb1-4GlcNAcb1-2Mana1-3)Manb1-4GlcNAcb1-4GlcNAc-Sp24	1009.09	628.825
130	Fuca1-4(Galb1-3)GlcNAcb-Sp8	989.222	574.105
260	Neu5Aca2-3Galb1-4GlcNAcb-Sp8	984.036	864.409
70	Fuca1-2Galb1-4(Fuca1-3)GlcNAcb1-3Galb1-4(Fuca1-3)GlcNAcb1-3Galb1-4(Fuca1-3)GlcNAcb-Sp0	956.709	481.856
237	Neu5Aca2-3GalNAcb1-4GlcNAcb-Sp0	923.782	454.696
575	Galb1-4GlcNAcb1-3Galb1-4GlcNAcb1-2Mana1-6(Galb1-4GlcNAcb1-3Galb1-4GlcNAcb1-2Mana1-3)Manb1-4GlcNAcb1-4(Fuca1-6)GlcNAcb-Sp24	919.475	195.672
329	Neu5,9Ac2a2-3Galb1-3GlcNAcb-Sp0	893.852	595.186
59	Fuca1-2Galb1-3GalNAcb1-3Gala1-4Galb1-4Glcb-Sp9	893.785	295.434
94	GalNAcb1-3GalNAca-Sp8	879.677	305.424
344	GlcNAca1-4Galb1-3GalNAc-Sp14	755.628	656.682
55	Neu5Aca2-6Galb1-4GlcNAcb1-2Mana1-6(Neu5Aca2-6Galb1-4GlcNAcb1-2Mana1-3)Manb1-4GlcNAcb1-4GlcNAcb-Sp12	745.532	328.08
107	Gala1-3(Fuca1-2)Galb-Sp8	738.7	474.299
310	GlcNAcb1-4GlcNAcb-Sp10	737.965	107.787
47	(6S)GlcNAcb-Sp8	733.147	229.661
449	Fuca1-2Galb1-4GlcNAcb1-6(Fuca1-2Galb1-4GlcNAcb1-3)GalNAc-Sp14	728.834	715.932
321	Neu5Aca2-8Neu5Acb-Sp17	706.226	207.377
416	Fuca1-2Galb1-4(Fuca1-3)GlcNAcb1-3GalNAca-Sp14	703.468	282.179
306	GalNAcb1-3Galb-Sp8	697.903	321.659
333	Gala1-4Galb1-4GlcNAcb1-3Galb1-4Glcb-Sp0	691.811	194.242
(B)	A/bat/Peru/10 NAL
Chart Number	Structure on Masterlist	Average RFU	StDev
310	GlcNAcb1-4GlcNAcb-Sp10	75.4188	42.0539
253	Neu5Aca2-3Galb1-4(Fuca1-3)GlcNAcb1-3Galb1-4(Fuca1-3)GlcNAcb1-3Galb1-4(Fuca1-3)GlcNAcb-Sp0	35.611	40.7092
421	GlcNAcb1-2(GlcNAcb1-6)Mana1-6(GlcNAcb1-2Mana1-3)Manb1-4GlcNAcb1-4GlcNAcb-Sp19	33.7508	8.56898
372	Gala1-3Galb1-4(Fuca1-3)GlcNAcb1-2Mana1-6(Gala1-3Galb1-4(Fuca1-3)GlcNAcb1-2Mana1-3)Manb1-4GlcNAcb1-4GlcNAcb-Sp20	31.9527	21.1655
11	Neu5Acb-Sp8	29.8688	10.0756
8	Rhaa-Sp8	29.2466	23.405
233	GalNAcb1-4(Neu5Aca2-3)Galb1-4Glcb-Sp0	28.689	31.5197
110	Gala1-3GalNAca-Sp8	28.3865	8.83475
27	(3S)Galb1-4(6S)Glcb-Sp8	27.3626	8.92836
242	Neu5Aca2-3Galb1-3(6S)GalNAca-Sp8	26.6981	36.0767
543	Neu5Gca2-3Galb1-4GlcNAcb1-3Galb1-4GlcNAcb1-2Mana1-6(Neu5Gca2-3Galb1-4GlcNAcb1-3Galb1-4GlcNAcb1-2Mana1-3)Manb1-4GlcNAcb1-4GlcNAcb-Sp24	26.4349	15.3344
30	(3S)Galb1-3GlcNAcb-Sp0	26.3108	11.4577
322	Neu5Aca2-8Neu5Aca2-8Neu5Acb-Sp8	25.8449	9.61343
146	Galb1-3Galb-Sp8	25.5057	9.76059
365	Fuca1-4(Galb1-3)GlcNAcb1-2Mana1-6(Fuca1-4(Galb1-3)GlcNAcb1-2Mana1-3)Manb1-4GlcNAcb1-4(Fuca1-6)GlcNAcb-Sp22	25.1734	7.60647
289	Galb1-3GlcNAcb1-3Galb1-3GlcNAcb-Sp0	24.4959	12.764
592	Neu5Aca2-3Galb1-4GlcNAcb1-3Galb1-4GlcNAcb1-3GalNAca-Sp14	24.4677	16.5483
20	Galb1-4GlcNAcb1-6(Galb1-4GlcNAcb1-3)GalNAc-Sp14	24.4228	5.92531
556	Neu5Gca2-8Neu5Gca2-6Galb1-4GlcNAc-Sp0	23.7526	1.30655
579	Galb1-4GlcNAcb1-3Galb1-4GlcNAcb1-3Galb1-4GlcNAcb1-3Galb1-4GlcNAcb1-2Mana1-6(Galb1-4GlcNAcb1-3Galb1-4GlcNAcb1-3Galb1-4GlcNAcb1-3Galb1-4GlcNAcb1-2Mana1-3)Manb1-4GlcNAcb1-4(Fuca1-6)GlcNAcb-Sp24	23.4044	8.84369
204	GlcAb1-6Galb-Sp8	23.0091	37.0193
542	Galb1-4GlcNAcb1-3Galb1-4GlcNAcb1-2Mana1-6(Galb1-4GlcNAcb1-3Galb1-4GlcNAcb1-2Mana1-3)Manb1-4GlcNAcb1-4GlcNAcb-Sp24	22.7684	10.6173
265	Neu5Aca2-6GalNAca-Sp8	22.6359	15.679
39	(6S)(4S)Galb1-4GlcNAcb-Sp0	22.4785	38.2626
17	GlcNAcb-Sp8	22.4592	5.06202
(C)	A/Vietnam/1203/2004 HA
Chart Number	Structure on Masterlist	Average RFU	StDev
251	Neu5Aca2-3Galb1-4(6S)GlcNAcb-Sp8	49850	2293.56
242	Neu5Aca2-3Galb1-3(6S)GalNAca-Sp8	48597.7	6566.04
483	Neu5Aca2-3Galb1-4GlcNAcb1-2Mana1-6(Neu5Aca2-3Galb1-4GlcNAcb1-2Mana1-3)Manb1-4GlcNAcb1-4(Fuca1-6)GlcNAcb-Sp24	44139.4	850.234
243	Neu5Aca2-6(Neu5Aca2-3Galb1-3)GalNAca-Sp8	43846.9	1290.59
247	Neu5Aca2-3Galb1-3GlcNAcb1-3Galb1-4GlcNAcb-Sp0	41109.3	2412.03
462	Neu5Aca2-3Galb1-4GlcNAcb1-6(Neu5Aca2-3Galb1-4GlcNAcb1-2)Mana1-6(GlcNAcb1-4)(Neu5Aca2-3Galb1-4GlcNAcb1-4(Neu5Aca2-3Galb1-4GlcNAcb1-2)Mana1-3)Manb1-4GlcNAcb1-4GlcNAcb-Sp21	40814.4	1133.16
441	Neu5Aca2-3Galb1-4GlcNAcb1-3Galb-Sp8	39566.5	1060.66
223	Neu5Aca2-3Galb1-3GalNAca-Sp8	38971.8	752.488
295	Neu5Aca2-3Galb1-4GlcNAcb1-3Galb1-3GlcNAcb-Sp0	38004.8	1610.34
294	Neu5Aca2-3Galb1-3GlcNAcb1-3Galb1-3GlcNAcb-Sp0	35265	622.64
258	Neu5Aca2-3Galb1-4GlcNAcb1-3Galb1-4GlcNAcb1-3Galb1-4GlcNAcb-Sp0	34368.8	1781.84
252	Neu5Aca2-3Galb1-4(Fuca1-3)(6S)GlcNAcb-Sp8	34212.5	761.773
317	Neu5Aca2-3Galb1-4GlcNAcb1-6(Neu5Aca2-3Galb1-3)GalNAca-Sp14	33530.1	1094.95
260	Neu5Aca2-3Galb1-4GlcNAcb-Sp8	33467.9	464.855
479	Neu5Aca2-3Galb1-4GlcNAcb1-6GalNAca-Sp14	33114.3	739.815
261	Neu5Aca2-3Galb1-4GlcNAcb1-3Galb1-4GlcNAcb-Sp0	32681.3	3036.75
259	Neu5Aca2-3Galb1-4GlcNAcb-Sp0	32224.4	751.774
461	Neu5Aca2-3Galb1-4GlcNAcb1-6(Neu5Aca2-3Galb1-4GlcNAcb1-2)Mana1-6(GlcNAcb1-4)(Neu5Aca2-3Galb1-4GlcNAcb1-2Mana1-3)Manb1-4GlcNAcb1-4GlcNAcb-Sp21	31682.3	2244.74
399	Neu5Aca2-3Galb1-3GlcNAcb1-3GalNAca-Sp14	31557.3	3698.54
460	Neu5Aca2-3Galb1-4GlcNAcb1-4Mana1-6(GlcNAcb1-4)(Neu5Aca2-3Galb1-4GlcNAcb1-4(Neu5Aca2-3Galb1-4GlcNAcb1-2)Mana1-3)Manb1-4GlcNAcb1-4GlcNAcb-Sp21	30638.1	3863.59
246	Neu5Aca2-3Galb1-3GalNAcb1-3Gala1-4Galb1-4Glcb-Sp0	30328.6	4316.81
459	Neu5Aca2-3Galb1-4GlcNAcb1-2Mana1-6(GlcNAcb1-4)(Neu5Aca2-3Galb1-4GlcNAcb1-2Mana1-3)Manb1-4GlcNAcb1-4GlcNAcb-Sp21	30135.9	4169.47
253	Neu5Aca2-3Galb1-4(Fuca1-3)GlcNAcb1-3Galb1-4(Fuca1-3)GlcNAcb1-3Galb1-4(Fuca1-3)GlcNAcb-Sp0	29204.2	2199.6
250	Neu5Aca2-3Galb1-3GlcNAcb-Sp8	28840	1005.76
237	Neu5Aca2-3GalNAcb1-4GlcNAcb-Sp0	28051.9	976.466
